# Supplementary material for: Ribosome rescue inhibitors clear Neisseria gonorrhoeae in vivo using a new mechanism
Source: bioRxiv or medRxiv preprint supplement (doi:10.1101/2020.06.04.132530), 2020-06-04
Supplement: Supplementary file [file media-1.pdf]

300  
301  
302  
303  
304  
305  
306  
307  
308  
309  
310  
311  
312  
  
313  
314  
315  
316  
317  
318  
319  
320  
321  
322  
  
323  
324  
325  
326

**Ribosome rescue inhibitors clear *Neisseria gonorrhoeae* in vivo using a new mechanism**

Zachary D. Aron<sup>1, †</sup>, Atousa Mehrani<sup>2, †</sup>, Eric D. Hoffer<sup>3, †</sup>, Kristie L. Connolly<sup>4</sup>, Matthew C. Torhan<sup>1</sup>, John N. Alumasa<sup>5</sup>, Pooja Srinivas<sup>3</sup>, Mynthia Cabrera<sup>5</sup>, Divya Hosangadi<sup>5</sup>, Jay S. Barbor<sup>1</sup>, Steven C. Cardinale<sup>1</sup>, Steven M. Kwasny<sup>1</sup>, Lucas R. Morin<sup>1</sup>, Michelle M. Butler<sup>1</sup>, Timothy J. Opperman<sup>1</sup>, Terry L. Bowlin<sup>1</sup>, Ann Jerse<sup>4</sup>, Scott M. Stagg<sup>2,6</sup>, Christine M. Dunham<sup>3</sup>, Kenneth C. Keiler<sup>5,\*</sup>

<sup>1</sup>Microbiotix, Inc. One Innovation Dr., Worcester, MA 01605, USA

<sup>2</sup>Department of Chemistry and Biochemistry, Florida State University

<sup>3</sup>Department of Biochemistry and Emory Antibiotic Resistance Center, Emory University School of Medicine

<sup>4</sup>Department of Microbiology and Immunology, Uniformed Services University, Bethesda, MD

<sup>5</sup>Department of Biochemistry & Molecular Biology, Penn State University

<sup>6</sup>Institute of Molecular Biophysics, Florida State University

\*Correspondence to: kkeiler@psu.edu

†These authors contributed equally

PDB accession code: 6OM6; EM accession code: EMD-20121

## 327 SUPPLEMENTAL TEXT

### 328 Structure-Activity Relationships

329 Compound optimization studies first focused on evaluation of overall structure activity  
330 relationships (SAR), resulting in a large data set, a selection of which is shown in Table S1.  
331 Analyses focused on the 4 conceptual zones of the molecule (Figure 1A). Although only partial  
332 details on SAR data are included here, a more detailed analysis will be the topic of a future  
333 publication.

334 Zone 1 was tolerant of aliphatic, aromatic and heteroaromatic groups (entries 1-3, Table S1;  
335 heteroaromatics not shown), but complete replacement of the Zone 1 substituent with a hydrogen  
336 atom was not tolerated (entry 4, Table S1). It should be noted that, although incorporating aliphatic  
337 groups in Zone 1 moderately increased potency, extensive oxidative metabolism at this site  
338 limited further work in this direction (not shown).

339 The oxadiazole ring (Zone 2) was critical to activity, with only oxadiazoles and oxazoles  
340 displaying measurable, if widely varied, activity, despite evaluation of >20 heterocycles  
341 (representative examples include entries 1, 5-6, Table S1). This high level of specificity is  
342 consistent with hydrogen-bonding and/or dipole-directed interactions with this moiety in the  
343 binding site, as these properties vary widely among oxadiazoles (1).

344 Efforts to identify amide isosteres or alternatives in Zone 3 that avoid the observed amidolysis  
345 in KKL-35 proved challenging because variation of the amide was poorly tolerated. Of >10  
346 isosteres examined, only analogs containing amides, ureas or *N*-alkyl amides were tolerated  
347 (entries 1, 7-9, and 12-16, Table S1). This specificity is consistent with binding interactions  
348 involving the oxygen of the Zone 2 amide and a requirement for planarity in this region of the  
349 molecule. Although replacement of the amide with a urea prevented amidolysis, simple ureas  
350 such as MBX-4346 (entry 12, Table S1) still demonstrated limited microsomal stability, consistent  
351 with aliphatic ring oxidation.

352 Variations in Zone 4 examined both amides and ureas. Among the amides, changes that  
353 disrupt coplanarity with the Zone 2 amide were poorly tolerated (e.g. aliphatics or C-2  
354 substituents; entries 10 and 11, Table S1). Aromatic groups were well tolerated in Zone 1, with  
355 hydrophobic substituents distal to the core leading to improved potency (not shown). Among the  
356 ureas, small rings were moderately tolerated, with 6- and 7-membered rings providing improved  
357 potency relative to 5 membered rings (entries 12-14, Table S1). Hydrophilic groups, such as the  
358 ether moiety in the morpholine ring of MBX-4697 (entry 15, Table S1) had a deleterious effect on  
359 potency, although they dramatically increased microsomal stability, consistent with limiting  
360 aliphatic group oxidation. Spirocyclic and bridged bicyclic rings had a significantly deleterious

361 effect on potency, consistent with a need for a relatively flat cross-section in this region of the  
362 molecule (not shown). Fused bicyclic groups were generally well tolerated, provided they did not  
363 include branching on the carbon directly attached to the urea moiety; of these, fused aryl rings  
364 provided excellent enhancement in both potency and metabolic stability, resulting in the  
365 identification of MBX-4132 (entry 16, Table S1).

366 Throughout SAR studies, *in vitro* ADME properties such as solubility, microsomal stability and  
367 cytotoxicity were monitored. Most compounds exhibited cytotoxicity profiles favorable for  
368 development and moderate-to-good solubility, likely due to the hydrophilic 1,3,4-oxadiazole  
369 moiety (1). An initial concern was metabolic stability, with the Zone 2 amide providing a particular  
370 liability. Replacement of this group with a urea moiety provided a clear solution to the problem  
371 (entries 12-16, Table S1). Further evaluation of MBX-4132 focused on ligand efficiency, serum  
372 effects and permeability (Table S2). These studies revealed excellent drug-like properties and  
373 predicted the observed oral bioavailability. It should be noted that MBX-4132 is highly serum-  
374 bound, a feature that has an impact on its potency in the presence of serum (Table S2).

375

## 376 SUPPLEMENTAL METHODS

### 377 Chemical Synthesis

378 All commercially obtained reagents and solvents were used as received. <sup>1</sup>H and <sup>13</sup>C NMR spectra  
379 were recorded on a Bruker 300 MHz instrument. Chemical shifts are given in δ values referenced  
380 to the internal standard tetramethylsilane (2). LC/MS analyses were performed on a Thermo-  
381 Finnigan Surveyor LC unit connected to a Thermo LTQ Fleet MS unit. HPLC purification was  
382 performed on a Gilson Unipoint instrument equipped with a 00G-4252-P0-AX C18, 10 micron,  
383 150 mm or 250mm x 21.2 mm column from Phenomenex. Silica column purification was  
384 performed on Isco brand Combi-flash R<sub>f</sub> liquid chromatography system using 50 μm silica  
385 Luknova SuperSep columns. Melting points were taken on EZ-Melt automated melting point  
386 apparatus (Stanford Research Systems, Inc.) in manual mode, and are uncorrected. Thin-layer  
387 chromatography was performed on silica gel GHLF plates from Analtech (Newark, DE), and the  
388 chromatograms were visualized under UV light at 254 nm. 5-(4-fluorophenyl)-1,3,4-oxadiazol-2-  
389 amine, 3-phenyl-1,2,4-oxadiazol-5-amine were purchased from Enamine (Kiev, Ukraine); 5-  
390 phenyl-1,2,4-oxadiazol-3-amine was purchased from Chembridge (San Diego, CA, USA); 5-  
391 cyclohexyl-1,3,4-oxadiazol-2-amine, 1,3,4-oxadiazol-2-amine were purchased from Life  
392 Chemicals (Niagara-on-the-Lake, ON, Canada); p-Toluenesulfonyl Chloride, 1,1'-  
393 Carbonyldiimidazole were purchased from Thermo Fisher Scientific (Acros Organics) (New  
394 Jersey, USA); 4-Chlorobenzoyl chloride was purchased from Thermo Fisher Scientific (Alfa

395 Aesar) (New Jersey, USA); 2-amino-5-phenyl-1,3,4-oxadiazole amine, 4-Chlorobenzoic acid,  
396 Cyclohexanecarboxylic acid, 4-Chlorobenzaldehyde, Pyrrolidine, Piperidine,  
397 Hexamethyleneimine, Morpholine, Methyl Iodide, Sodium Triacetoxyborohydride,  
398 Diisopropylethyl amine, Triethylamine, and all solvents were purchased from Millipore-Sigma (St.  
399 Louis, MO, USA); 1,2,3,4-tetrahydro-isoquinoline and 4-chlorobenzene sulfonyl chloride were  
400 purchased from Combi-Blocks (San Diego, CA, USA); 4-methyl-1,2,3,6-tetrahydropyridine  
401 hydrochloride was purchased from Pharmablock (Hatfield, PA, USA); HATU was purchased from  
402 GenScript (Piscataway, NJ, USA).

403 *General Method A:* Heteroaryl amine (1.1eq) was dissolved in NMP (0.29 M) and triethylamine  
404 (1.2 eq) stirred for 10 min at room temperature; to this solution, acid chloride (1 eq) was added  
405 dropwise via pipette. The reaction mixture was allowed to continue stirring at room temperature  
406 for 16-20 h. If the reaction did not reach completion, the mixture was warmed to 50°C for an  
407 additional 16-20 h. Upon completion, reaction mixture was added to water, and the resulting  
408 precipitate was filtered and dried. Crude precipitate purified with HPLC (5-95% MeCN/H<sub>2</sub>O + 0.1%  
409 TFA).

410 *General Method B:* Carboxylic acid (1.1 eq) and HATU/HBTU (1.2 eq) were dissolved in NMP  
411 (0.28 M), to which N,N-diisopropylethylamine (1.2 eq) and heteroaryl amine (1 eq) were added.  
412 The reaction was stirred at room temperature for 16-20hr. If the reaction did not reach completion,  
413 the mixture was warmed to 50°C for an additional 16-20hr. Upon completion, reaction mixture  
414 was added to water, and the resulting precipitate was filtered and dried. Crude precipitate purified  
415 with HPLC (5-95% MeCN/H<sub>2</sub>O + 0.1% TFA).

416 *General Method C:* To oxadiazole amine (eq) and 1,1'-Carbonyldiimidazole (1 eq) in N-methyl  
417 imidazole (0.56 M) was added 3 Å ( ) molecular sieves (1.6mm pellets: ~4 pellets/mmol). Reaction  
418 was stirred at room temperature for 3-16 h. Then, the second amine (1.1 eq) was added to the  
419 reaction and continued stirring at room temperature for 2-18 h. Upon completion, reaction mixture  
420 was added to water, and the resulting precipitate was filtered and dried. Crude precipitate purified  
421 with HPLC (5-95% MeCN/H<sub>2</sub>O + 0.1% TFA).

422 KKL-35/MBX-3535: Prepared according to General Method A to provide material consistent with  
423 prior reports (3). 15.0 mg (7%); mottled tan powder; <sup>1</sup>H NMR (DMSO): 12.35 (br, 1H), 8.08-8.01  
424 (m, 4H), 7.65 (d, 2H), 7.47 (t, 2H); LC/MS: 318.0 (M+1); mp: >240°C (decomp.); R<sub>f</sub>: 0.25 (50%  
425 EtOAc/hexanes).

426 MBX-4083: Prepared according to General Method A. 26.0 mg (14%); off-white solid; <sup>1</sup>H NMR  
427 (DMSO): 12.75 (br s, 1H), 8.07-7.99 (m, 4H), 7.67-7.58 (m, 5H); LC/MS: 300.0 (M+1); mp: 182-  
428 188°C; R<sub>f</sub>: 0.64 (50% EtOAc/hexanes).



429 MBX-3943: Prepared according to General Method A. 12.0 mg (6%); white solid; <sup>1</sup>H NMR  
430 (DMSO): 11.77-11.68 (m, 1H), 8.14-7.91 (m, 4H), 7.76-7.53 (m, 5H); LC/MS: 300.2 (M+1); mp:  
431 >102°C (slow); R<sub>f</sub>: 0.65 (50% EtOAc/hexanes).

432 MBX-3910: Prepared according to General Method A to provide material consistent with prior  
433 reports (4). 30.0 mg (16%); white solid; <sup>1</sup>H NMR (DMSO): 12.26 (br, 1H), 8.08-7.96 (m, 4H), 7.67-  
434 7.62 (m, 5H); LC/MS: 300.2 (M+1); mp: 250-259°C; R<sub>f</sub>: 0.34 (50% EtOAc/hexanes).

435 MBX-4370: Prepared according to General Method A to provide material consistent with prior  
436 reports (3). 26.0 mg (28%); White solid; <sup>1</sup>H NMR (DMSO): 11.95 (bs, 1H), 8.02-8.00 (m, 2H), 7.64-  
437 7.61 (m, 2H), 2.94 (m, 1H), 2.02-1.98 (m, 2H), 1.77-1.41 (m, 8H); LC/MS: 306.2 (M+1); mp: 204-  
438 206°C; R<sub>f</sub>: 0.72 (5% MeOH/DCM).

439 MBX-4367: Prepared according to General Method A. 17.0 mg (13%); white solid; <sup>1</sup>H NMR  
440 (DMSO): 12.12 (bs, 1H), 9.10 (s, 1H), 8.06-7.98 (m, 2H), 7.65-7.59 (m, 2H); LC/MS: 224.0 (M+1);  
441 mp: 212-214°C; R<sub>f</sub>: 0.32 (5% MeOH/DCM).

442 MBX-C4227: Material was purchased and tested as received from Life Chemicals, Inc.

443 MBX-3709: Prepared according to General Method A. 150 mg (97%); light brown solid; <sup>1</sup>H NMR  
444 (DMSO): 11.66 (s, 1H), 7.99-7.95 (m, 2H), 7.47-7.41 (m, 2H), 1.87-1.66 (m, 6H), 1.41-1.22 (m,  
445 6H); LC/MS: 290.0 (M+1); mp: >205°C (slow); R<sub>f</sub>: 0.73 (3.75:46.25:50 MeOH/EtOAc/DCM).

446 MBX-3776: Prepared in a manner to that previously described (5), by dissolving (E/Z)-N-(4-  
447 chlorobenzylidene)-5-(4-fluorophenyl)-1,3,4-oxadiazol-2-amine (0.331mmol, 1.0 eq), and  
448 NaHB(OAc)<sub>3</sub> (0.430 mmol, 1.3 eq) in dichloromethane (1 ml), stirred at room temperature for 18  
449 h. Adsorbed material onto Celite and isolated product from column chromatography eluted with  
450 linear gradient of 0-50% EtOAc in Hexanes. 27.0 mg (27%); White solid; <sup>1</sup>H NMR (DMSO): 8.39  
451 (t, 1H), 7.87-7.82 (m, 2H), 7.41-7.34 (m, 6H), 4.43 (d, 2H); LC/MS: 304.1 (M+1); mp: 165-167°C;  
452 R<sub>f</sub>: 0.42 (50% EtOAc/hexanes).

453 MBX-4076: Prepared by dissolving 4-chloro-N-(5-(4-fluorophenyl)-1,3,4-oxadiazol-2-  
454 yl)benzamide (MBX-3535, 0.220 mmol, 1.0 eq) in DMF (2 ml), to which K<sub>2</sub>CO<sub>3</sub> (0.264 mmol, 1.1  
455 eq) was added and the mixture was stirred at room temperature for 2 h. Then methyl iodide (0.220  
456 mmol, 1.0 eq) was added and continued to stir at room temperature for an additional 65 h. The  
457 reaction was diluted with water (~30 ml), solid precipitate was filtered and dried under high  
458 vacuum. Product was purified by HPLC (20-100% MeCN/H<sub>2</sub>O + 0.1% TFA) and freeze dried to  
459 solid. 13.0 mg (18%); White solid; <sup>1</sup>H NMR (CDCl<sub>3</sub>): 8.21 (d, 2H), 8.01-7.97 (m, 2H), 7.40 (d, 2H),  
460 7.22 (t, 2H), 3.74 (s, 3H); LC/MS: 332.2 (M+1); mp: >148°C (slow); R<sub>f</sub>: 0.66 (50%  
461 EtOAc/hexanes).

462 MBX-4063: Prepared according to modified General Method A; used solvent mixture of  
463 Pyridine/Dichloromethane (1/1 mixture) instead of NMP and triethyleamine. 33.0 mg (18%); white  
464 solid; <sup>1</sup>H NMR (CDCl<sub>3</sub>): 7.96-7.86 (m, 4H), 7.34-7.16 (m, 4H + CHCl<sub>3</sub>), 2.42 (s, 3H); LC/MS: 334.1  
465 (M+1); mp: 218-221°C; R<sub>f</sub>: 0.14 (50% EtOAc/hexanes).

466 MBX-4346: Prepared according to General Method C. 15.0 mg (20%); light yellow solid; <sup>1</sup>H NMR  
467 (CDCl<sub>3</sub>): 7.98-7.95 (m, 2H), 7.20-7.14 (m, 2H), 3.57 (m, 4H), 1.96 (m, 4H); LC/MS: 277.1 (M+1);  
468 mp: 197-199°C; R<sub>f</sub>: 0.94 (10% MeOH/DCM).

469 MBX-4699: Prepared according to General Method C. 13.0 mg (9%); white solid; <sup>1</sup>H NMR (CDCl<sub>3</sub>):  
470 7.97-7.92 (m, 2H), 7.21-7.15 (m, 2H), 3.65 (m, 4H), 1.62 (m, 6H); LC/MS: 291.5 (M+1); mp: 200-  
471 203°C; R<sub>f</sub>: 0.64 (10% MeOH/DCM).

472 MBX-4700: Prepared according to General Method C. 15.0 mg (33%); white solid; <sup>1</sup>H NMR (CDCl<sub>3</sub>  
473 + MeOD): 7.92-7.88 (m, 2H), 7.13-7.07 (m, 2H), 3.48 (m, 4H), 1.69 (m, 4H), 1.52-1.50 (m, 4H);  
474 LC/MS: 305.7 (M+1); mp: 191-194°C; R<sub>f</sub>: 0.63 (10% MeOH/DCM).

475 MBX-4697: Prepared according to General Method C. 8.9 mg (15%); white solid; <sup>1</sup>H NMR (CDCl<sub>3</sub>  
476 + MeOD): 7.93-7.89 (m, 2H), 7.18-7.12 (m, 2H), 3.66 (m, 8H); LC/MS: 293.9 (M+1); mp: 211-  
477 216°C; R<sub>f</sub>: 0.55 (10% MeOH/DCM).

478 MBX-4366: Prepared according to General Method C. 19.0 mg (23%); white solid; <sup>1</sup>H NMR  
479 (CDCl<sub>3</sub>): 7.98-7.93 (m, 2H), 7.21-7.16 (t, 2H), 5.41 (m, 1H), 4.11 (m, 2H), 3.78 (m, 2H), 2.11 (m,  
480 2H), 1.73 (s, 3H); LC/MS: 303.0 (M+1); mp: 180-181°C; R<sub>f</sub>: 0.74 (5% MeOH/DCM).

481 MBX-4132: Prepared according to General Method C; dried precipitate solids were triturated in  
482 MeOH (~50mL) yielded pure product. 375 mg (40%); white solid; <sup>1</sup>H NMR (DMSO): 7.98-7.94 (m,  
483 2H), 7.46-7.40 (m, 2H), 7.19 (s, 4H), 4.69 (s, 2H), 3.75 (t, 2H), 2.85 (t, 2H); LC/MS: 339.1 (M+1);  
484 mp: >190°C (slow); R<sub>f</sub>: 0.51 (50% EtOAc/hexanes).

485

## 486 **Bacterial Strains and Growth Conditions**

487 Bacterial strains, plasmids, and synthetic sequences are shown in Table S9. *E. coli* strains  
488 expressing L27 were constructed by transducing a *tolC::cat* allele into IW312 strains using a P1  
489 *vir* phage. These strains were grown in LB medium containing 1 mM IPTG. To quantify the *in vitro*  
490 antibacterial activity of acylaminooxadiazole analogs against various bacterial strains, the  
491 minimum inhibitory concentration (MIC) was measured using microbroth dilution assays as  
492 described in the CLSI guidelines (M7-A7) (6), except that liquid G77L medium (7) was used for  
493 *Neisseria gonorrhoeae* MIC assays. Each assay comprised three technical replicates, and each  
494 assay was repeated at least once. The reported MIC is the geometric mean of at least 5 technical

495 replicates. H041(STM<sup>R</sup>) is a streptomycin-resistant derivative of the multi-drug resistant (MDR),  
496 ceftriaxone-resistant strain H041 (Ohnishi) and was cultured as previously described (8–10).

497

#### 498 **Time-kill assays**

499 The time kill assay was performed essentially as described (11) with the following modifications  
500 for *N. gonorrhoeae*. The bacterial inoculum for the assays was prepared by suspending colonies  
501 of *N. gonorrhoeae* ATCC 49226 grown on a chocolate agar plate for >24 h (37 °C with 5% CO<sub>2</sub>)  
502 in G77L medium. The cell suspension was adjusted to an OD<sub>600</sub> of 0.1 and was diluted 1:10 in  
503 G77L media (final cell density ~1 × 10<sup>7</sup> cells/ml) containing various concentrations of MBX-4132.  
504 The resulting cultures were incubated at 37 °C (5% CO<sub>2</sub>), and viability was monitored over 24 h  
505 by removing samples at various time points, making serial 10-fold dilutions in G77L, and spotting  
506 5 µl of each dilution onto the surface of a chocolate agar plate in triplicate. Colonies were counted  
507 after the plates were incubated at 37 °C (5% CO<sub>2</sub>) for 18-18 h, colony forming units (cfu) per ml  
508 were calculated, and the average and standard deviation for the three replicates was determined.  
509 The lower limit of detection of this assay was determined to be 100-200 cfu/ml. This experiment  
510 was repeated three times, and the results of a representative experiment are shown.

511

#### 512 ***In vitro* trans-translation and translation assays**

513 The *in vitro* trans-translation assay is designed to produce the first 157 amino acids of nano-  
514 luciferase from a non-stop mRNA (nanoluc-ns) and add the C-terminal peptide  
515 AAVSGWRLFKKIS via a mutant version of *E. coli* tmRNA (tmRNA-nl) to reconstitute an active  
516 nano-luciferase (12). In this assay, the tagged nano-luciferase gene has >30,000-fold increase in  
517 activity over the peptide made in the absence of tmRNA-nl.

518 S12 lysates were made according to the procedure of Kim, et al., (13). Briefly, a culture of *E.*  
519 *coli* BL21 (DE3) cells containing a pET28 plasmid carrying the *E. coli* T7 polymerase gene was  
520 grown at 37 °C to an OD<sub>600</sub> = 0.8, induced with 1 mM IPTG and grown for an additional 3 h. Cells  
521 were harvested by centrifugation at 20,000 *g* for 10 min at 4°C and the pellet was resuspended  
522 in buffer A (20 mM Tris-acetate (pH 8.2), 14 mM Mg(OAc)<sub>2</sub>, 60 mM potassium glutamate, 1 mM  
523 DTT). Cells were lysed by sonication, the lysate was clarified by centrifugation at 12,000 *g* for 10  
524 min, and the supernatant was stored at -80 °C.

525 *E. coli* SmpB was purified as previously described (14). tmRNA-nl, a variant of *E. coli* tmRNA  
526 encoding the final 11 residues of nano-luciferase, was transcribed from the tmRNA-nl synthetic  
527 DNA sequence *in vitro*, purified, and folded as previously described for wild-type *E. coli* tmRNA  
528 (14). The nanoluc-stop template DNA was prepared as previously described (14) by PCR

529 amplification from pMC1 using T7 universal and nanoluc-stop primers. The nanoluc-ns was  
530 prepared in a similar manner using pMC1 with T7 universal and nanoluc-ns primers.

531 For *in vitro trans*-translation, tmRNA-nl and SmpB were premixed and stored on ice. S12  
532 lysate (2  $\mu$ l), freshly made polymix buffer (2  $\mu$ l) (15) (final reaction concentrations 5 mM Hepes  
533 pH 7.6, 5 mM NH<sub>4</sub>Cl, 0.5 mM CaCl<sub>2</sub>, 1.5 mM MgCl<sub>2</sub>, 1 mM DTT, 8 mM putrescine, 2 mM ATP, 2  
534 mM GTP, 1 mM CTP, 1 mM UTP, 0.3 mM each amino acid, 3 mg/ml *E. coli* tRNAs), nanoluc-ns  
535 template (0.5  $\mu$ l; 60 ng) and 2  $\mu$ l water were mixed and incubated at 37 °C for 5 min. This solution  
536 was dispensed to tubes containing 0.5  $\mu$ l of different concentrations of an inhibitor prepared in  
537 75% acetonitrile, 25% water, and incubated at 37 °C for 5 min. The tmRNA-nl/SmpB mixture (0.5  
538  $\mu$ l each, 2  $\mu$ M final) was added to each tube and the samples were incubated at 37 °C for 1.5 h.  
539 NanoLuc substrate (Promega) was prepared according to the manufacturer's instructions, one  
540 volume of this substrate solution was added to each sample tube, and the reactions transferred  
541 to a white 96-well plate. Luminescence readings were obtained using the SpectraMax i3  
542 microplate reader. Data analysis was performed using GraphPad Prism 8.

543

#### 544 **Frequency of resistance**

545 First, MIC values were determined for MBX-4132 using the reference agar dilution method (6,  
546 16). *N. gonorrhoeae* strain 49226 (ATCC) was suspended to the equivalent of a 5 McFarland  
547 standard in G77L broth and then diluted to generate the final inoculum (1.5 x 10<sup>5</sup>). The bacterial  
548 cell suspension was then transferred to wells in a stainless-steel replicator block which was used  
549 to inoculate the test plates. After the inoculum had dried, all plates were incubated at 35°C in 5%  
550 CO<sub>2</sub>. The MIC was read post-incubation per CLSI guidelines (6, 16). To determine the frequency  
551 of resistance, stock solutions of MBX-4132 were prepared at 100X the final test concentrations of  
552 4 $\times$  and 8 $\times$  the predetermined MIC value. A 0.5 mL aliquot of the 100X stock was mixed with 49.5  
553 mL of molten GC Medium agar/1% IsoVitalEx to produce an agar/drug mixture that was either 4-  
554 or 8-fold the MIC and dispensed into sterile 150 x 15 mm plates (VWR) at a volume of 50 mL per  
555 plate. A dense cell suspension equivalent to 5 McFarland was prepared using bacterial growth  
556 from 48 h chocolate agar plates of *N. gonorrhoeae* (ATCC 49226). The viable count of each  
557 suspension was determined by plating serial ten-fold dilutions onto GC Medium agar/1%  
558 IsoVitalEx in duplicate. A 0.25 ml aliquot of inoculum was spread onto the surface of duplicate  
559 150 x 15 mm test plates. After allowing the inoculum to dry on the surface of the plate, the plates  
560 were inverted and incubated at 35°C (with 5% CO<sub>2</sub>) for 48 h. Colony counts were determined  
561 manually and the spontaneous mutation frequency was calculated using the following equation:  
562 Average number of colonies from selection plates/Total number of cells inoculated

563 If there were no colonies on the antibiotic selection plates, the spontaneous mutation frequency  
564 was calculated as 1/inoculum to indicate that the spontaneous mutation frequency was less than  
565 the limit of detection (one cfu).

566

#### 567 **Mammalian cell cytotoxicity (CC<sub>50</sub>)**

568 The half maximal cytotoxic concentration (CC<sub>50</sub>) of each compound against HeLa cells (ATCC  
569 CCL-2) was measured as previously described (17). Each assay comprised three technical  
570 replicates, and each assay was repeated at least once. The mean values for each biological  
571 replicate were averaged, and the CC<sub>50</sub> was determined using a 4-parameter nonlinear curve fitting  
572 algorithm (GraphPad Prism). The average of the CC<sub>50</sub>s from two biological replicates was  
573 calculated and reported.

574

#### 575 **Murine liver microsome stability**

576 To examine potential for first-pass metabolism of analogs in the liver, the stability of analogs in  
577 the presence of mouse liver microsome preparations (Eurofins Discovery for human, dog and rat;  
578 Xenotech for mouse) was measured using the method of Kuhnz, et al. (18) for murine studies and  
579 Oback for the dog, human and rat studies. (19). The amount of parent compound remaining after  
580 incubation with microsomes in the presence of NADPH over a 30 min time range was measured  
581 using a reverse-phase liquid chromatography/mass spectroscopy method that was customized  
582 for each compound. Half-lives were calculated using linear regression analysis of several time  
583 points.

584

#### 585 **Caco-2 permeability**

586 To evaluate the potential for oral bioavailability, the ability of prioritized compounds to permeate  
587 a monolayer of Caco-2 intestinal epithelial cells was determined as described (20). Caco-2  
588 permeability values ( $P_{app}$ )  $>1 \times 10^{-6}$  cm/sec are predictive of oral bioavailability. The observation  
589 that  $P_{app\ A \rightarrow B} > P_{app\ B \rightarrow A}$  indicates that efflux from the basolateral compartment does not occur.

590

#### 591 **Serum Protein Binding**

592 Serum protein (fetal bovine) binding was determined using an equilibrium dialysis method as  
593 described (21). The amount of compound in each chamber (buffer and serum) was measured  
594 using methods for reverse-phase liquid chromatography/mass spectroscopy methods that were  
595 customized for each compound.

596

597 **Aqueous solubility**

598 The maximum aqueous solubility of each compound was determined using a nephelometric  
599 method as described (22). Each assay comprised three technical replicates, and each assay was  
600 repeated at least once. The reported solubility is the average of at least 5 technical replicates.

601

602 **Cell-based non-stop luciferase reporter assay**

603 To verify that MBX-4132 retains activity as an inhibitor of trans-translation, we measured its dose-  
604 dependent activity against the non-stop luciferase reporter assay strain *E. coli* SB75  $\Delta$ tolC::kan  
605 (pluc-trpAt) essentially as described (14), with modifications. Briefly, serial 1.5-fold dilutions of  
606 MBX-4132 in DMSO were transferred to 96-well assay plates (Costar 3195), followed by the  
607 addition of 50  $\mu$ l of an overnight culture of SB75  $\Delta$ tolC::kan (pluc-trpAt) that had been diluted to a  
608 final OD<sub>600</sub> of 0.4 with LB media supplemented with 100  $\mu$ g ampicillin/ml and 1 mM IPTG. The  
609 final concentrations of MBX-4132 ranged from 0.05 – 1.5  $\mu$ M, and the final concentration of DMSO  
610 was 2%. The assay plates were incubated at room temperature for 2 h, and 50  $\mu$ l of BrightGlo  
611 (Promega) bioluminescence reagent was added to each well. After 10 min incubation,  
612 bioluminescence intensity was measured using an Envision multi-label plate reader (Perkin  
613 Elmer). Each assay comprised three technical replicates, and the experiment was repeated three  
614 times. The fold induction for each MBX-4132 treated sample as compared to the DMSO-only  
615 sample was calculated for each technical replicate, and the average and standard deviation of  
616 the three technical was calculated. The IC<sub>50</sub> was determined using a 4-parameter nonlinear curve  
617 fitting algorithm (GraphPad Prism).

618

619 **CYP450 Inhibition, Receptor Panel Profiling, and Cardiac Ion Channel Profiling**

620 Several *in vitro* selectivity assays were performed at Eurofins Discovery Services using  
621 established methods and controls that behaved as expected (Tables S5 & S6). For CYP450  
622 inhibition assays, activity of MBX-4132 was tested at 5 concentrations from 30 nM to 100  $\mu$ M; no  
623 inhibitory activity >50% was observed at any concentration. For receptor panel profiling, MBX-  
624 4132 was evaluated at 10  $\mu$ M and activity of >50% (agonist or antagonist) was scored as active.

625

626 **Ames Assay**

627 The Ames assay was performed at SRI Biosciences, following the standard protocols established  
628 there (23–25). In brief, samples were evaluated for their ability to induce genetic damage using  
629 the plate incorporation method with *Salmonella typhimurium* strains TA98 and TA100 with and  
630 without a metabolic activation mixture containing 10% Aroclar-1254-induced rat-liver microsomes

631 (S9). MBX-4132 was tested from a 5 mg/mL DMSO stock solution (the solubility limit), which  
632 provided plate concentrations up to 500 µg/plate, with serial dilutions accessing doses as low as  
633 5 µg/plate. MBX-4132 precipitated at the two highest dose levels (500 and 100 µg/plate), but at  
634 50 µg/plate, no precipitation was observed. Precipitation did not interfere with colony counts or  
635 analysis. Test articles were considered mutagenic when the mean number of revertant colonies  
636 increased in a dose-dependent manner. Some cytotoxicity was observed, but sufficient colonies  
637 were formed to allow analysis. As shown in Table S6, MBX-4132 exhibited no significant deviation  
638 in revertant colonies from the DMSO control at any concentration tested. Data for 2-nitrofluorene  
639 and sodium azide (positive controls) and DMSO (negative control) were included for reference.

640

#### 641 **Mitochondrial Toxicity Assays (performed at Eurofins Cerep Panlabs)**

##### 642 *Multiplexed cytotoxicity assay*

643 Human primary hepatocytes were grown on collagen I coated optical plates, cultured in  
644 hepatocytes culture media in a humidified 5% CO<sub>2</sub> atmosphere at 37 °C. Cells were incubated in  
645 the presence of MBX-4132 at 10 concentrations starting at 100 µM and serially diluted 3.16-fold  
646 for 24 h at 37 °C, incubated for 30 min with multiplexed fluorescent dyes (Hoescht, 6-carboxy-  
647 2',7'-dichlorodihydrofluorescein diacetate, and TMRE) and imaged to allow visualization of nuclei,  
648 reactive oxygen species generation, and mitochondrial oxidation. A >3.5-fold induction of ROS  
649 was considered consistent with formation of ROS and a >2-fold change in TMRE signal indicated  
650 an increase or decrease in mitochondrial membrane potential (26).

##### 651 *Mitochondrial toxicity assay*

652 HepG2 cells were seeded and cultured in media containing either glucose or galactose overnight.  
653 Test compounds were added at 8 concentrations (3-fold serial dilution from 100 µM to 30 nM) and  
654 incubated with the cells for 24 h. Cell viability was measured by the alamarBlue method. The data  
655 in Table S7 are inconsistent with MBX-4132 disrupting mitochondrial metabolic processes (27).

656

#### 657 **Pharmacokinetic analyses in mice**

658 *For PO suspension dosing (Performed at Neosome LLC):*

659 Female CD-1 mice were fasted for 2 h prior, and 4 h after dosing. MBX-4132 was administered  
660 male BalB/C mice at 10 mL/kg via oral gavage with a 1.0, 2.5 or 10.0 mg/ml suspension in vehicle  
661 A (5% DMSO, 5% Cremophor EL<sup>®</sup>, 0.45% hydroxypropylmethylcellulose, 0.45% alginate acid,  
662 22.5% hydroxy-beta-cyclodextrin). At 0.25, 0.5, 1, 2, 4, 8 and 24 h post dose, 3 mice from each  
663 group were euthanized by CO<sub>2</sub> inhalation, blood was collected by cardiac puncture into K<sub>2</sub>EDTA

664 collection tubes, and protein was precipitated and analysed by LC/MS-MS for plasma  
665 concentrations of MBX-4132. Data were analysed using WinNonLin.

666 *For IV and SC dosing* (performed at Charles River Labs):

667 MBX-4132 was administered at 6 ml/kg via direct tail vein puncture (IV, slow push), oral gavage  
668 (PO) or subcutaneously to the intrascapular region (SC) in a 2 mg/ml 10% DMSO/80% PEG-  
669 400/10% water formulation. For oral dosing, mice were fasted for 2 h prior and four hours post  
670 dosing. At 0.083, 0.5, 1, 4, 8 and 24 h post dose, blood was collected from 3 mice/group by tail  
671 vein or facial bleed into K<sub>2</sub>EDTA collection tubes, and protein was precipitated and analysed by  
672 LC/MS-MS for plasma concentrations of MBX-4132. Sampling was performed serially, with each  
673 mouse contributing sample at all time points. Data were analysed using WinNonLin.

674

### 675 **Murine tolerability studies**

676 (All testing was performed at Neosome LLC)

677 *Single dose tolerability studies:*

678 Female CD-1 mice were fasted for 2 h prior, and 4 h after dosing. MBX-4132 was administered  
679 at 10 ml/kg via oral gavage with a 0.0 (vehicle control), 1.0, 2.5 or 10.0 mg/ml suspension in  
680 vehicle A. Mice were observed at 0.083, 0.25, 0.5, 1, 2, 5, 8 and 24 h post dosing, and any  
681 abnormal observations (behaviour, agility, coat condition and appearance, color of urine, quality  
682 of feces, etc.) were noted. No abnormal observations of any dosing group were made during the  
683 24 h course of this study.

684 *Multidose tolerability studies:*

685 In preparation for this study, an abbreviated version of the above murine PK study using the same  
686 formulation examined fasted mice vs. fed mice was performed, with plasma samples taken at 1  
687 and 4 h post dosing and analyses as described in the PK section. No significant variation in  
688 exposure was observed at either timepoint.

689 Female CD-1 mice were given free access to food and water. MBX-4132 was administered to  
690 groups of 3 mice for 7 d either QD (with compound) or BID (two groups, one vehicle only and one  
691 with compounds) at 10 ml/kg via oral gavage with a 1.0 mg/ml suspension in A. Mice were  
692 observed twice daily for 10 d (3 d post final dose), additionally, mice were weighed daily. Any  
693 abnormal observations (behaviour, agility, weight, coat condition and appearance, color of urine,  
694 quality of feces, etc.) were noted. No abnormal observations of any dosing group were made  
695 during the 24 h course of this study. One mouse in the vehicle only group did exhibit a slight  
696 weight loss but had recovered weight by the end of the study.

697



698 ***In vivo* efficacy testing in the gonorrhea mouse model**

699 Groups of female BALB/cAnNCr mice (Charles River Laboratories) (6-7 weeks old) were treated  
700 with 17 $\beta$ -estradiol and antibiotics (streptomycin and trimethoprim) to increase susceptibility to  
701 long-term *N. gonorrhoeae* infection as described (8). Mice were inoculated vaginally with *N.*  
702 *gonorrhoeae* strain H041 (10<sup>4</sup> cfu/mouse) two days after estradiol pellet implantation and vaginal  
703 swabs were cultured for two days post-bacterial inoculation to confirm infection. On the afternoon  
704 of the second culture day (day 0), mice were given MBX-4132, GEN or the vehicle (n= 20-21  
705 mice/group). Doses of MBX-4132 were prepared fresh in vehicle at the time of treatment and  
706 administered as a single oral dose (dose volume 10 ml/kg). The positive control GEN (48 mg/kg)  
707 was prepared and administered intraperitoneally as 5 daily doses as previously described (8).  
708 Vaginal swabs were collected on 8 consecutive days following treatment and quantitatively  
709 cultured for *N. gonorrhoeae* to assess efficacy. The data are expressed as CFU/ml of vaginal  
710 swab suspension. Clearance was shown by Kaplan-Meier curves with log-rank (Mantel-Cox)  
711 statistical analysis. The average cfu/ml over time was compared by 2-way ANOVA with Bonferroni  
712 post-hoc analysis. Statistics were performed in GraphPad Prism Software. At the study endpoint  
713 (10 days post-inoculation), mice were euthanized using compressed CO<sub>2</sub> gas in a CO<sub>2</sub> gas  
714 chamber in the Laboratory Animal Medicine Facility. All animal experiments were conducted at  
715 the Uniformed Services University of the Health Sciences, a facility fully accredited by the  
716 Association for the Assessment and Accreditation of Laboratory Animal Care, under a protocol  
717 that was approved by the university's Institutional Animal Care and Use Committee.

718

719 **Purification of stalled ribosome complexes**

720 To construct pET28-H10arfArnc, a DNA cassette encoding 10 histidine residues, the M2 epitope,  
721 3 glycine residues, and 20 arbitrary codons followed by 71 base pairs from the 3' end of the *E.*  
722 *coli* *arfA* gene was synthesized and assembled into pET28 that had been digested with NcoI and  
723 HindIII (28). The sequence from *arfA* contains the RNase III cleavage site (29, 30). Translation of  
724 the cleaved mRNA produces a 59 amino acid peptide with 10 histidines at the N terminus.

725 *E. coli* 70S ribosomes were purified as described previously (31). *E. coli* BL21(DE3) pET28-  
726 H10arfArnc cells were grown to an A<sub>600</sub> of ~0.5 in Luria broth (LB) medium at 37 °C and induced  
727 with 1  $\mu$ M IPTG and 1  $\mu$ M KKL-2098 (synthesized as previously described (32)) and continued to  
728 grow for an additional hour at 37 °C then cooled on ice for 20 min. All centrifugation steps were  
729 performed at 4 °C. Cells were pelleted by centrifugation and washed with buffer 1 (10 mM HEPES-  
730 KOH, pH 7.6, 10 mM MgCl<sub>2</sub>, 1 M NH<sub>4</sub>Cl, 6 mM  $\beta$ -mercaptoethanol ( $\beta$ -Me)) twice and then  
731 resuspended in buffer 2 (10 mM HEPES-KOH, pH 7.6, 10 mM MgCl<sub>2</sub>, 100 mM NH<sub>4</sub>Cl, 6 mM  $\beta$ -

732 Me). The cells were crosslinked under ultraviolet light (254 nm) for 10 min, then lysed using an  
733 EmulsiFlex-C5 high-pressure homogenizer (Avestin). Cell debris was removed by centrifuging at  
734  $13,000 \times g$  for 15 min. The lysate was further centrifuged at  $27,000 \times g$  for 30 min to obtain the  
735 S30 fraction. Ribosomes were pelleted by centrifuging at  $42,000 \times g$  for 17 h. The pellets were  
736 resuspended in buffer 2 and bound to a 1 mL IMAC gravity column, washed with 10 column  
737 volumes of Buffer 2 and eluted with Buffer 2 supplemented with 500  $\mu\text{M}$  imidazole. Ribosomes  
738 were further purified over a 10–40% sucrose gradient in buffer 2 at  $70,000 \times g$  for 12 h. 70S  
739 ribosomes were separated from polysomes and subunits using a Brandel gradient fractionator.  
740 The 70S fractions were pooled, pelleted, resuspended in buffer 2, and stored at  $-80 \text{ }^\circ\text{C}$ .

741

## 742 **Cryo-Electron Microscopy**

743 UltrAuFoil<sup>®</sup> grids (Quantifoil, R1.2/1.3) were glow-discharged for 20 s with a Solarus 950 (Gatan).  
744 3  $\mu\text{l}$  of 70S complexes at 100 nM were placed on grids at  $8 \text{ }^\circ\text{C}$  in 100% humidity and blotted for  
745 3.5 s using a Vitrobot Mark IV (FEI).

746 Two independent datasets of 2,394 micrographs total (1863 and 531 micrographs,  
747 respectively) were collected on a Titan Krios (FEI) microscope operated at 300 kV with a C2  
748 aperture diameter of 70  $\mu\text{m}$ . Movie frames were recorded at an accumulated dose of  $58 \text{ e}^-/\text{Å}^2$  at  
749 a magnification of 59,000X (corresponding to a pixel value of 1.191  $\text{Å}$ ) with a DE-64 direct electron  
750 detector in counting mode (33) using Leginon (34) for automatic data acquisition. Images were  
751 recorded with a total exposure time of 19.3 s, and intermediate frames were recorded every 0.2  
752 s giving a total of 78 frames per image. Two independent datasets of 70S ribosomes specimens  
753 were collected with an overall of 2,394 micrographs (1863 and 531 micrographs from the first and  
754 the second datasets, respectively). Defocus values ranged from  $-1.3$  to  $-3 \mu\text{m}$ . All the pre-  
755 processing steps were performed in the Appion (35).

756

## 757 **Image processing**

### 758 **Pre-processing**

759 All processing steps were carried out using Appion (35). All frames of each micrograph were  
760 aligned using MotionCor2 (36). Contrast transfer function (CTF) parameters were estimated on  
761 all motion-corrected micrographs using CTFFIND4 (37) and GCTF (36) and the best estimate  
762 chosen using resolution evaluation in Appion (38). 197 micrographs were excluded after manual  
763 visualization of their corresponding power spectra displayed ice contamination, exposure to the  
764 shifted beam, or low-resolution Thon ring profiles. An initial set of  $\sim 2000$  particles were picked  
765 using DoG (Difference of Gaussian) Picker (39). A rotational average was generated from these

766 picks, and this was used as a template for template-based picking using FindEM (40). A total of  
767 474,382 particles (373,845 and 100,537 particles from the first and the second dataset,  
768 respectively) were picked. Particles were extracted with a box size of 384x384 pixels in Appion.

769 Extracted particles from the two datasets were processed independently and combined after  
770 the last round of 3D reconstruction, and subjected to further 3D classifications and refinements in  
771 RELION-3 (41) (Figure S2). Processing steps were initially performed on a 4X-binned dataset.

772 Initial 3D refinement occurred against a 60 Å low-pass filtered empty *E. coli* 70S ribosome  
773 from a previous dataset. 3D classification without alignment was used to discard free 50S  
774 subunits. The resulting 70S classes were combined and refined using an initial angular sampling  
775 of 7.5° and local angular sampling of 1.8° to improve angular assignment. Following refinement,  
776 another round of 3D classification without alignment was performed, with low resolution particles  
777 and particles containing E-site tRNA discarded. Two classes with an unrotated 70S were  
778 combined and subjected to refinement, followed by focused classification with a P-site mask. The  
779 P-site mask was generated from a 70S ribosome with P-site tRNA (PDB ID 4V4I) (42), with a 5-  
780 voxel expansion and a 7-voxel soft edge. This resulted in a class of 70S particles with P-site  
781 tRNA. These particles were unbinned, refined, then underwent focused classification with an A  
782 site mask, created as stated, using a model of the 70S ribosome with A-site tRNA (PDB ID 4V5D)  
783 (43). Classes with P-site tRNA but no A-site tRNA were refined and post-processed.

784

#### 785 **Post-processing and beam-tilt correction**

786 The resultant map was post-processed in RELION using a solvent mask generated from the final  
787 reconstruction low-pass filtered to 40 Å with a 7-pixel extension and 10-pixel soft edge. Beam-tilt  
788 estimation and correction was performed (without per-particle refinement of CTF parameters)  
789 using CTF refinement followed by 3D reconstruction. These steps were repeated iteratively until  
790 the highest resolution was achieved, and the final map post-processed with a solvent mask.  
791 Resolution estimations were calculated from Fourier shell correlations (FSC) at 0.143 between  
792 the two independently refined half-maps. Maps were sharpened in PHENIX (44). The graphs of  
793 directional 3D FSC and global resolution of the maps were plotted using 3DFSC Processing  
794 Server (45). Local resolution was estimated using blocres in Bsoft (46).

795

796

## 797 SUPPLEMENTAL TABLES

798 Table S1: Properties of acylaminoxadiazoles (subset of SAR analogs).

| 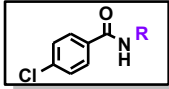 |                     |                                                                                   |                                      |                                              |                        |                               |                  |                   |  |
|-----------------------------------------------------------------------------------|---------------------|-----------------------------------------------------------------------------------|--------------------------------------|----------------------------------------------|------------------------|-------------------------------|------------------|-------------------|--|
| #                                                                                 | CMPD#               | R                                                                                 | Luc<br>IC <sub>50</sub> <sup>a</sup> | $\Delta$ toIC<br>E. coli<br>MIC <sup>b</sup> | Ng<br>MIC <sup>b</sup> | CC <sub>50</sub> <sup>c</sup> | Sol <sup>d</sup> | MLMS <sup>e</sup> |  |
| 1                                                                                 | KKL-35/<br>MBX-3535 |  | 0.23                                 | 0.49                                         | 0.12                   | >100                          | 25               | <5                |  |
| 2                                                                                 | MBX-3910            |  | 0.14                                 | 1.9                                          | 0.30                   | 40                            | 13               | 5                 |  |
| 3                                                                                 | MBX-4370            |  | 0.13                                 | 0.48                                         | 0.12                   | 17                            | 50               | <5                |  |
| 4                                                                                 | MBX-4367            |  | >25                                  | 22.3                                         | 11.2                   | >100                          | >200             | 8                 |  |
| 5                                                                                 | MBX-4083            |  | 1.4                                  | 2.7                                          | 4.8                    | >100                          | 6.3              | <5                |  |
| 6                                                                                 | MBX-3943            |  | >25                                  | >30                                          | 15.0                   | >100                          | 13               | <5                |  |

  

|  |           |                                                                                     |                                      |                                              |                        |                               |                  |                   |  |
|-----------------------------------------------------------------------------------|-----------|-------------------------------------------------------------------------------------|--------------------------------------|----------------------------------------------|------------------------|-------------------------------|------------------|-------------------|--|
| #                                                                                 | CMPD#     | R                                                                                   | Luc<br>IC <sub>50</sub> <sup>a</sup> | $\Delta$ toIC<br>E. coli<br>MIC <sup>b</sup> | Ng<br>MIC <sup>b</sup> | CC <sub>50</sub> <sup>c</sup> | Sol <sup>d</sup> | MLMS <sup>e</sup> |  |
| 7                                                                                 | MBX-3776  |    | >25                                  | >30                                          | >30                    | >100                          | 25               | 5                 |  |
| 8                                                                                 | MBX-4076  |   | 1.05                                 | 4.6                                          | 2.7                    | 95                            | <3.1             |                   |  |
| 9                                                                                 | MBX-4063  |  | >25                                  | >33                                          | >33                    | >100                          | 100              | 53                |  |
| 10                                                                                | MBX-3709  |  | 12.5                                 | 28.9                                         | 4.6                    | >100                          | 25               | <5                |  |
| 11                                                                                | MBX-C4227 |  | 1.0                                  | 0.88                                         | 1.1                    | >100                          | 50               |                   |  |

  

**Urea Variants**

|    |          |                                                                                     |      |      |      |      |      |      |  |
|----|----------|-------------------------------------------------------------------------------------|------|------|------|------|------|------|--|
| 12 | MBX-4346 |  | 14.3 | 27.6 | 4.4  | >100 | >200 | 25   |  |
| 13 | MBX-4699 |  | 2.1  | 7.3  | 0.58 | >100 | 50   | 12   |  |
| 14 | MBX-4700 |  | 1.8  | 4.8  | 0.61 | >100 | 25   | 10   |  |
| 15 | MBX-4697 |  | 9.2  | 29.2 | 4.7  | >100 | 100  | >120 |  |
| 16 | MBX-4132 |  | 0.19 | 2.7  | 0.18 | 45   | 100  | >120 |  |

<sup>a</sup> Half Maximal activity in  $\Delta$ toIC *E. coli* luciferase assay ( $\mu$ M) <sup>b</sup> MIC vs *Neisseria gonorrhoeae* (49226) or *E. coli* KLE701 in  $\mu$ g/mL. <sup>c</sup> Against HeLa cells ( $\mu$ M). <sup>d</sup> Solubility in water ( $\mu$ M; nephelometry). <sup>e</sup> Murine liver microsome stability,  $t_{1/2}$  in min at 37 °C in the presence of NADPH.

799

800

801 Table S2: In Vitro ADME Properties

|          | Microsomal Stability ( $t_{1/2}$ ; min) |      |      |      | serum              |                   | Serum Binding (% bound) |      |      |       | Caco-2<br>( $P_{app}$ ; $\times 10^{-6} \text{ cm s}^{-1}$ ) |     |
|----------|-----------------------------------------|------|------|------|--------------------|-------------------|-------------------------|------|------|-------|--------------------------------------------------------------|-----|
|          | Murine                                  | Rat  | Dog  | Hum. | Shift <sup>a</sup> | Stab <sup>b</sup> | Murine                  | Rat  | Dog  | Human | A→B                                                          | B→A |
| MBX-4132 | >120                                    | >120 | >120 | >120 | 12                 | >99.8             | 98.0                    | 93.0 | 99.0 | 99.0  | 11.1                                                         | 7.3 |

<sup>a</sup>Ratio of MIC +/- 10% fetal bovine serum added. <sup>b</sup>% remaining after 1 h incubation at 37 °C.

802

803

804

805 Table S3: Anti-gonococcal spectrum

| Strain      | Resistance/Description  | MIC ( $\mu\text{g/ml}$ ) |          |
|-------------|-------------------------|--------------------------|----------|
|             |                         | KKL-35                   | MBX-4132 |
| ATCC 49226  | type strain             | 0.12                     | 0.13     |
| ATCC 700719 | SPT                     | 0.25                     | 0.21     |
| ATCC 700825 | STR                     | 0.06                     | 0.04     |
| BAA-1846    | TET                     | 0.06                     | 0.04     |
| HO41        | PEN, TET, CFM, CRO, LVX | 0.25                     | 0.17     |
| CDC-0165    | CIP, PEN, TET           | n.d.                     | 0.68     |
| CDC-0166    | CIP, PEN, TET           | n.d.                     | 0.17     |
| CDC-0167    |                         | n.d.                     | 0.13     |
| CDC-0169    | CIP, PEN, TET           | n.d.                     | 0.17     |
| CDC-0170    | CIP, PEN, TET           | n.d.                     | 0.17     |
| CDC-0171    | CIP, PEN, TET           | n.d.                     | 0.17     |
| CDC-0172    | CIP, PEN, TET           | n.d.                     | 0.17     |
| CDC-0173    | CIP, PEN, TET           | n.d.                     | 0.17     |
| CDC-0174    | CIP, PEN, TET           | n.d.                     | 0.17     |
| CDC-0175    | CIP, PEN, TET           | n.d.                     | 0.08     |
| CDC-0176    |                         | n.d.                     | 0.34     |
| CDC-0177    | CIP, PEN, TET           | n.d.                     | 0.17     |
| CDC-0178    | TET                     | n.d.                     | 0.34     |
| CDC-0179    | CIP, PEN, TET           | n.d.                     | 0.08     |
| CDC-0180    |                         | n.d.                     | 0.17     |
| CDC-0181    | CIP, PEN, TET           | n.d.                     | 0.17     |
| CDC-0182    | TET                     | n.d.                     | 0.17     |
| CDC-0183    | CIP, PEN, TET           | n.d.                     | 0.34     |
| CDC-0184    | CIP, PEN, TET           | n.d.                     | 0.17     |
| CDC-0185    | CIP, PEN, TET           | n.d.                     | 0.27     |
| CDC-0186    | CIP, PEN, TET           | n.d.                     | 0.17     |
| CDC-0187    | CIP, PEN, TET           | n.d.                     | 0.34     |
| CDC-0188    | CIP, PEN                | n.d.                     | 0.17     |
| CDC-0189    | CIP, PEN, TET           | n.d.                     | 0.13     |
| CDC-0190    | CIP, PEN, TET           | n.d.                     | 0.17     |
| WHO F       |                         | n.d.                     | 0.06     |
| WHO G       | PEN, TET                | n.d.                     | 0.13     |
| WHO K       | CIP, PEN, TET           | n.d.                     | 0.26     |
| WHO L       | CIP, PEN, TET           | n.d.                     | 0.26     |

|                             |                    |                       |                       |
|-----------------------------|--------------------|-----------------------|-----------------------|
| WHO M                       | CIP,PEN,TET        | n.d.                  | 0.13                  |
| WHO N                       | CIP, PEN, TET      | n.d.                  | 0.26                  |
| WHO O                       | PEN, TET           | n.d.                  | 0.13                  |
| WHO P                       | PEN, TET           | n.d.                  | 0.33                  |
| WHO U                       | PEN, TET           | n.d.                  | 0.13                  |
| WHO V                       | AZM, CIP, PEN, TET | n.d.                  | 0.26                  |
| WHO W                       | CIP, PEN, TET      | n.d.                  | 0.13                  |
| WHO X                       | CIP, PEN, TET      | n.d.                  | 0.21                  |
| WHO Y                       | CIP, PEN, TET      | n.d.                  | 0.21                  |
| WHO Z                       | CIP, PEN, TET      | n.d.                  | 0.26                  |
| MMX ATCC 49226              |                    | 0.25                  | 0.27                  |
| MMX 6744                    |                    | 0.13                  | 0.27                  |
| MMX 6746                    | CIP                | 0.13                  | 0.14                  |
| MMX 6752                    | TET                | 0.25                  | 0.27                  |
| MMX 6753                    |                    | 0.06                  | 0.14                  |
| MMX 6757                    |                    | 0.06                  | 0.07                  |
| MMX 6758                    |                    | 0.13                  | 0.27                  |
| MMX 6762                    |                    | 0.13                  | 0.27                  |
| MMX 6767                    |                    | 0.06                  | 0.14                  |
| MMX 6771                    | TET                | 0.06                  | 0.14                  |
| MMX 6793                    | CIP                | 0.06                  | 0.14                  |
| MMX 6797                    | CIP, TET           | 0.06                  | 0.14                  |
| MMX 6803                    | CIP                | 0.13                  | 0.27                  |
| MMX 6812                    | CIP                | 0.13                  | 0.27                  |
| MMX 6818                    | CIP                | 0.13                  | 0.27                  |
| MMX 6819                    | CIP                | 0.13                  | 0.14                  |
| MMX 6879                    |                    | 0.06                  | 0.14                  |
| MMX 6921                    | CIP                | 0.25                  | 0.53                  |
| MMX 6922                    | CIP                | 0.25                  | 0.53                  |
| MMX 6983                    | CIP                | 0.25                  | 0.53                  |
| MMX 6989                    |                    | 0.13                  | 0.14                  |
| MMX 6990                    | CIP                | 0.06                  | 0.14                  |
| MMX 6992                    |                    | 0.13                  | 0.14                  |
| MMX 6996                    |                    | 0.13                  | 0.27                  |
| MMX 6998                    | CIP                | 0.25                  | 0.53                  |
| MMX 7002                    | CIP                | 0.13                  | 0.27                  |
| MMX 7005                    |                    | 0.03                  | 0.03                  |
| <b>MIC<sub>90</sub> (n)</b> |                    | <b>0.25 (32)</b>      | <b>0.53 (71)</b>      |
| <b>MIC Range (n)</b>        |                    | <b>0.03-0.25 (32)</b> | <b>0.03-0.68 (71)</b> |

SPT, spectinomycin; STR, streptomycin; TET, tetracycline; PEN, penicillin G; CFM, cefixime; CRO, ceftriazone; CIP, ciprofloxacin; LVX, levofloxacin; AZM, azithromycin; MMX, Micromyx, LLC strain (these MIC assays were performed, using the broth dilution method, by Micromyx, LLC.)

806

807 **Table S4.** Antibacterial spectrum

| Category      | Organism                        | Strain          | Resistance/Description    | MIC (µg/ml) |          |
|---------------|---------------------------------|-----------------|---------------------------|-------------|----------|
|               |                                 |                 |                           | KKL-35      | MBX-4132 |
| Gram-negative | <i>Escherichia coli</i>         | KLE700          |                           | ≥32         | ≥35      |
|               | <i>Escherichia coli</i>         | KLE701          | KLE700 $\Delta$ tolC::tet | 0.5         | 2.7      |
|               | <i>Klebsiella pneumoniae</i>    | ATCC 13883      |                           | n.d.        | ≥35      |
|               | <i>Acinetobacter baumannii</i>  | ATCC 19606      |                           | >32         | ≥35      |
|               | <i>Pseudomonas aeruginosa</i>   | ATCC 27853      |                           | >32         | ≥35      |
|               | <i>Moraxella catarrhalis</i>    | 8716            |                           | n.d.        | 0.04     |
|               | <i>Legionella pneumophila</i>   | ATCC 33153      |                           | n.d.        | 8.7      |
|               | <i>Haemophilus influenzae</i>   | ATCC 35056      |                           | n.d.        | 17.5     |
| Gram-positive | <i>Staphylococcus aureus</i>    | BAA-1717        | MRSA                      | n.d.        | 1.21     |
|               | <i>Staphylococcus aureus</i>    | MRSA-1234547263 | MRSA                      | 1           | 3.2      |
|               | <i>Staphylococcus aureus</i>    | MRSA-1094       | MRSA                      | 1           | 3.2      |
|               | <i>Staphylococcus aureus</i>    | ATCC 35556      |                           | 1           | 4.2      |
|               | <i>Staphylococcus aureus</i>    | NRS-77          |                           | 1           | 3.2      |
|               | <i>Staphylococcus aureus</i>    | MSSA            |                           | 1           | 4.2      |
|               | <i>Staphylococcus aureus</i>    | N315, NRS-70    | MRSA                      | 1.5         | 6.3      |
|               | <i>Staphylococcus aureus</i>    | ATCC 25923      |                           | 1.5         | 6.3      |
|               | <i>Staphylococcus aureus</i>    | THC1516         | MRSA                      | 0.9         | 1        |
|               | <i>Streptococcus pneumoniae</i> | ATCC 49619      |                           | n.d.        | 34.9     |
|               | <i>Mycoplasma pneumoniae</i>    | ATCC 15531      |                           | n.d.        | 34.9     |

808

809 **Table S5.** Eurofins Discovery Services *In Vitro* Safety Panel, Cyp inhibition assays and Cardiac  
 810 Ion Channel interaction results for MBX-4132.

| Catalog ref <sup>A</sup> | Receptor Profiling                                   | Species | Conc       | % inhibition |
|--------------------------|------------------------------------------------------|---------|------------|--------------|
| 104010                   | Cholinesterase, Acetyl, ACES                         | hum     | 10 $\mu$ M | 6            |
| 116030                   | Cycloogenase COX-1                                   | hum     | 10 $\mu$ M | 8            |
| 118030                   | Cycloogenase COX-2                                   | hum     | 10 $\mu$ M | 10           |
| 140010                   | Monoamine Oxidase MAO-A                              | hum     | 10 $\mu$ M | -108         |
| 152300                   | Phosphodiesterase PDE3A                              | hum     | 10 $\mu$ M | -6           |
| 154420                   | Phosphodiesterase PDE4D2                             | hum     | 10 $\mu$ M | 3            |
| 176020                   | Protein Tyrosine Kinase, LCK                         | hum     | 10 $\mu$ M | 29           |
| 200610                   | Adenosine A <sub>2A</sub>                            | hum     | 10 $\mu$ M | 42           |
| 203110                   | Adrenergic $\alpha_{1A}$                             | hum     | 10 $\mu$ M | 6            |
| 203630                   | Adrenergic $\alpha_{2A}$                             | hum     | 10 $\mu$ M | 35           |
| 204010                   | Adrenergic $\beta_1$                                 | hum     | 10 $\mu$ M | -8           |
| 204110                   | Adrenergic $\beta_2$                                 | hum     | 10 $\mu$ M | 35           |
| 206000                   | Androgen (testosterone)                              | hum     | 10 $\mu$ M | -2           |
| 214600                   | Calcium Channel L-Type, Dihydropyridine              | rat     | 10 $\mu$ M | 11           |
| 217050                   | Cannabinoid CB <sub>1</sub>                          | hum     | 10 $\mu$ M | -4           |
| 217100                   | Cannabinoid CB <sub>2</sub>                          | hum     | 10 $\mu$ M | -4           |
| 218030                   | Cholecystokinin CKK <sub>1</sub> (CCK <sub>A</sub> ) | hum     | 10 $\mu$ M | 66           |
| 219500                   | Dopamine D <sub>1</sub>                              | hum     | 10 $\mu$ M | 26           |
| 219700                   | Dopamine D <sub>2s</sub>                             | hum     | 10 $\mu$ M | 21           |
| 224010                   | Endothelin ET <sub>A</sub>                           | hum     | 10 $\mu$ M | -15          |
| 226600                   | GABA <sub>A</sub> , Flunitrazepam, Central           | rat     | 10 $\mu$ M | 3            |
| 232030                   | Glucocorticoid                                       | hum     | 10 $\mu$ M | -2           |
| 232810                   | Glutamate, NMDA, Agonism                             | rat     | 10 $\mu$ M | 8            |
| 239610                   | Histamine H <sub>1</sub>                             | hum     | 10 $\mu$ M | 11           |
| 239710                   | Histamine H <sub>2</sub>                             | hum     | 10 $\mu$ M | -7           |
| 252610                   | Muscarinic M <sub>1</sub>                            | hum     | 10 $\mu$ M | -7           |
| 252710                   | Muscarinic M <sub>2</sub>                            | hum     | 10 $\mu$ M | 7            |
| 252810                   | Muscarinic M <sub>3</sub>                            | hum     | 10 $\mu$ M | 5            |
| 299031                   | Nicotinic Acetylcholine $\alpha_4\beta_2$ , Cytisine | hum     | 10 $\mu$ M | -5           |
| 260130                   | Opiate Delta <sub>1</sub> (OP1, DOP)                 | hum     | 10 $\mu$ M | 5            |
| 260210                   | Opiate Kappa (OP2, KOP)                              | hum     | 10 $\mu$ M | 13           |
| 260410                   | Opiate Mu (OP3, MOP)                                 | hum     | 10 $\mu$ M | 17           |



| 265510                   | Potassium Channel [K <sub>A</sub> ]                 | rat        | 10 µM   | -2                         |
|--------------------------|-----------------------------------------------------|------------|---------|----------------------------|
| 265910                   | Potassium Channel hERG, [ <sup>3</sup> H Dofetilide | hum        | 10 µM   | 27                         |
| 271110                   | Serotonin (5-hydroxytryptamine) 5-HT <sub>1A</sub>  | hum        | 10 µM   | 30                         |
| 271230                   | Serotonin (5-hydroxytryptamine) 5-HT <sub>1B</sub>  | hum        | 10 µM   | 21                         |
| 271650                   | Serotonin (5-hydroxytryptamine) 5-HT <sub>2A</sub>  | hum        | 10 µM   | 18                         |
| 271700                   | Serotonin (5-hydroxytryptamine) 5-HT <sub>2B</sub>  | hum        | 10 µM   | 44                         |
| 271910                   | Serotonin (5-hydroxytryptamine) 5-HT <sub>3</sub>   | hum        | 10 µM   | 4                          |
| 279510                   | Sodium Channel, Site 2                              | rat        | 10 µM   | 21                         |
| 220320                   | Transporter, Dopamine (DAT)                         | hum        | 10 µM   | 3                          |
| 204410                   | Transporter, Norepinephrine (NET)                   | hum        | 10 µM   | 6                          |
| 274030                   | Transporter, Serotonin (5-Hydroxytryptamine) (SERT) | hum        | 10 µM   | -10                        |
| 287530                   | Vasopressin V <sub>1A</sub>                         | hum        | 10 µM   | -4                         |
| Catalog ref <sup>A</sup> | Cyp Inhibition Assays                               |            | Species | pIC <sub>50</sub>          |
| 4876                     | CYP1A inhibition (Phenacetin substrate)             |            | hum     | NC <sup>B</sup>            |
| 4877                     | CYP2B6 inhibition (Bupropion substrate)             |            | hum     | >100 µM                    |
| 4879                     | CYP2C8 inhibition (Amodiaquine substrate)           |            | hum     | >100 µM                    |
| 4878                     | CYP2C9 inhibition (Diclofenac substrate)            |            | hum     | NC <sup>B</sup>            |
| 4874                     | CYP2C19 inhibition (Omeprazole substrate)           |            | hum     | >100 µM                    |
| 4875                     | CYP2D6 inhibition (Dextromethorphan substrate)      |            | hum     | >100 µM                    |
| 4873                     | CYP3A inhibition (Midazolam substrate)              |            | hum     | NC <sup>B</sup>            |
| 4872                     | CYP3A inhibition (Testosterone substrate)           |            | hum     | >100 µM                    |
| Catalog ref <sup>A</sup> | Cardiac Ion Channel Panel                           | Mode       |         | Est. IC <sub>50</sub> (µM) |
| CYL8004QP2DR             | Nav1.5                                              | Antagonist |         | >30                        |
| CYL8038QP2DR             | hERG                                                | Antagonist |         | >30                        |
| CYL8007QP2DR             | KCNQ1/mink                                          | Antagonist |         | >30                        |
| CYL8069QP2DR             | Kv4.3/ChIP2                                         | Antagonist |         | >30<br>(Peak&End)          |
| CYL8032QP2DR             | Kir2.1                                              | Antagonist |         | >30<br>(Peak&End)          |

|                     |                            |                   |               |
|---------------------|----------------------------|-------------------|---------------|
| <b>CYL8051QP2DR</b> | <b>Cav1.2</b>              | <b>Antagonist</b> | <b>&gt;30</b> |
| <b>CYL7004QP1DR</b> | <b>Nav1.5 late current</b> | <b>Agonist</b>    | <b>&gt;30</b> |
| <b>CYL7004QP2DR</b> | <b>Nav1.5 late current</b> | <b>Antagonist</b> | <b>&gt;30</b> |

<sup>A</sup>Assays were performed using established protocols by Eurofins Discovery Services; catalog references provided. <sup>B</sup>No activity observed at any tested concentration.

811

812

813 **Table S6.** Evaluation of MBX-4132 in the *Salmonella*/Microsome Plate Incorporation Assay  
 814 (AMES Screen) performed by SRI Biosciences, a division of SRI International.

| Strain | Test Compound/Condition | Dose ( $\mu\text{g}/\text{plate}$ ) | Mean Revertants/plate |
|--------|-------------------------|-------------------------------------|-----------------------|
| TA98   | DMSO                    | N/A                                 | 23.7 $\pm$ 6.7        |
| TA100  | DMSO                    | N/A                                 | 127.34.5 $\pm$ 4.5    |
| TA98   | DMSO+S9                 | N/A                                 | 28.75.9 $\pm$ 5.9     |
| TA100  | DMSO+S9                 | N/A                                 | 129.0 $\pm$ 4.4       |
| TA98   | 2-Nitrofluorene         | 5                                   | 1331.3 $\pm$ 171.6    |
| TA100  | Sodium Azide            | 5                                   | 2029.0 $\pm$ 49.6     |
| TA98   | 2-Aminoanthracene + S9  | 2                                   | 1206.7 $\pm$ 169.1    |
| TA100  | 2-Aminoanthracene + S9  | 2                                   | 1438.7 $\pm$ 55.8     |
| TA98   | MBX-4132                | 1                                   | 21.5 $\pm$ 2.1        |
| TA98   | MBX-4132                | 5                                   | 17.0 $\pm$ 1.4        |
| TA98   | MBX-4132                | 10                                  | 15.0 $\pm$ 1.4        |
| TA98   | MBX-4132                | 50                                  | 20.0 $\pm$ 2.8        |
| TA98   | MBX-4132                | 100                                 | 20.0 $\pm$ 2.8        |
| TA98   | MBX-4132                | 500                                 | 17.5 $\pm$ 2.1        |
| TA100  | MBX-4132                | 1                                   | 112.5 $\pm$ 6.4       |
| TA100  | MBX-4132                | 5                                   | 99.0 $\pm$ 1.4        |
| TA100  | MBX-4132                | 10                                  | 97.0 $\pm$ 4.2        |
| TA100  | MBX-4132                | 50                                  | 73.0 $\pm$ 8.5        |
| TA100  | MBX-4132                | 100                                 | 54.0 $\pm$ 1.4        |
| TA100  | MBX-4132                | 500                                 | 35.5 $\pm$ 3.5        |
| TA98   | MBX-4132 + S9           | 1                                   | 23.5 $\pm$ 2.1        |
| TA98   | MBX-4132 + S9           | 5                                   | 22.0 $\pm$ 0.0        |
| TA98   | MBX-4132 + S9           | 10                                  | 21.0 $\pm$ 2.8        |
| TA98   | MBX-4132 + S9           | 50                                  | 18.5 $\pm$ 0.7        |
| TA98   | MBX-4132 + S9           | 100                                 | 17.5 $\pm$ 3.5        |
| TA98   | MBX-4132 + S9           | 500                                 | 20.0 $\pm$ 2.8        |
| TA100  | MBX-4132 + S9           | 1                                   | 107.5 $\pm$ 4.9       |
| TA100  | MBX-4132 + S9           | 5                                   | 125.5 $\pm$ 7.8       |
| TA100  | MBX-4132 + S9           | 10                                  | 102.0 $\pm$ 15.6      |
| TA100  | MBX-4132 + S9           | 50                                  | 71.0 $\pm$ 4.2        |
| TA100  | MBX-4132 + S9           | 100                                 | 43.0 $\pm$ 4.2        |
| TA100  | MBX-4132 + S9           | 500                                 | 19.5 $\pm$ 0.7        |

815

816

817

818 **Table S7.** Results from mitochondrial toxicity studies examining the effect of MBX-4132 on  
 819 reactive oxygen species (ROS), mitochondrial membrane potential (MMP) and differential  
 820 cytotoxicity against HepG2 cells grown on glucose or galactose.

| Compound | Conc. ( $\mu\text{M}$ ) | Attached live cells (%) | ROS (fold induction) | MMP inhibition (fold induction) |
|----------|-------------------------|-------------------------|----------------------|---------------------------------|
| MBX-4132 | 3.18E-03                | 105.6 $\pm$ 7.5         | 3.1 $\pm$ 4.1        | 1.0 $\pm$ 0.1                   |
| MBX-4132 | 1.01E-02                | 109.5 $\pm$ 8.4         | 1.4 $\pm$ 0.4        | 1.0 $\pm$ 0.1                   |
| MBX-4132 | 3.18E-02                | 97.5 $\pm$ 12.2         | 0.9 $\pm$ 0.5        | 0.9 $\pm$ 0.2                   |
| MBX-4132 | 1.00E-01                | 96.7 $\pm$ 6.9          | 1.4 $\pm$ 1.1        | 1.2 $\pm$ 0.3                   |
| MBX-4132 | 3.17E-01                | 114.0 $\pm$ 14.4        | 1.2 $\pm$ 0.5        | 0.9 $\pm$ 0.1                   |
| MBX-4132 | 1.00E+00                | 106.3 $\pm$ 3.3         | 1.2 $\pm$ 0.4        | 0.9 $\pm$ 0.1                   |
| MBX-4132 | 3.17E+00                | 99.6 $\pm$ 6.1          | 1.1 $\pm$ 0.3        | 1.0 $\pm$ 0.2                   |
| MBX-4132 | 1.00E+01                | 97.7 $\pm$ 9.4          | 1.9 $\pm$ 1.0        | 1.1 $\pm$ 0.1                   |
| MBX-4132 | 3.16E+01                | 89.5 $\pm$ 3.6          | 1.3 $\pm$ 0.6        | 1.1 $\pm$ 0.1                   |
| MBX-4132 | 1.00E+02                | 69.6 $\pm$ 12.3         | 9.2 $\pm$ 3.6        | 0.8 $\pm$ 0.1                   |
| Compound | Conc. ( $\mu\text{M}$ ) | Cell type               | Medium               | % viability                     |
| MBX-4132 | 3.00E-06                | HepG2                   | Glucose              | 109.6 $\pm$ 0.2                 |
| MBX-4132 | 1.00E-05                | HepG2                   | Glucose              | 107.8 $\pm$ 2.1                 |
| MBX-4132 | 3.00E-05                | HepG2                   | Glucose              | 106.5 $\pm$ 3.3                 |
| MBX-4132 | 1.00E-04                | HepG2                   | Glucose              | 85.6 $\pm$ 1.8                  |
| MBX-4132 | 3.00E-06                | HepG2                   | Glucose              | 94.1 $\pm$ 9.3                  |
| MBX-4132 | 1.00E-05                | HepG2                   | Glucose              | 95.4 $\pm$ 0.7                  |
| MBX-4132 | 3.00E-05                | HepG2                   | Glucose              | 96.8 $\pm$ 0.4                  |
| MBX-4132 | 1.00E-04                | HepG2                   | Glucose              | 64.0 $\pm$ 10.3                 |

821

822

823 **Table S8.** Data collection, model building and refinement.

824

| <b>Data collection</b>                          |                            |  |
|-------------------------------------------------|----------------------------|--|
|                                                 | <b>70S-P-tRNA-KKL-2098</b> |  |
| Voltage (keV)                                   | 300                        |  |
| Magnification                                   | 59,000                     |  |
| Electron dose (e <sup>-</sup> /Å <sup>2</sup> ) | 58                         |  |
| Pixel size (Å/pix)                              | 1                          |  |
| Detector                                        | DE64 counting mode         |  |
| Defocus range (µm)                              | 1.5-3.5                    |  |
| Micrographs                                     | 2,197                      |  |
| Total Particles                                 | 474,382                    |  |
| <b>Reconstruction</b>                           |                            |  |
| Particles included                              | 28,121                     |  |
| FSC <sub>0.5</sub>                              | 3.8                        |  |
| FSC <sub>0.143</sub>                            | 3.1                        |  |
| <b>Model Refinement</b>                         |                            |  |
| <b>CCmap_model</b>                              | 0.88                       |  |
| <b>Model quality</b>                            |                            |  |
| RMSD                                            |                            |  |
| Bond lengths (Å) / Bond angles (°)              | 0.007/0.897                |  |
| Ramachandran plot statistics                    |                            |  |
| Most favored (%)                                | 94.7                       |  |
| Allowed                                         | 4.22                       |  |
| Outliers (%)                                    | 1.12                       |  |
| Rotamer outliers (%)                            | 0.3                        |  |
| Cβ outliers                                     | 0.0                        |  |
| Clashscore                                      | 6.66                       |  |

857 **Table S9.** Bacterial strains, plasmids, and synthetic sequences.

| <u>strain name</u>                         | <u>description</u>                                         | <u>source</u> |
|--------------------------------------------|------------------------------------------------------------|---------------|
| <i>E. coli</i> BL21 (DE3) pET28-H10arfArnc | Strain for expressing non-stop ribosomes                   | this work     |
| IW312                                      | <i>E. coli</i> LG90 $\Delta$ <i>rpmA</i>                   | (47)          |
| IW312 pL27                                 | contains plasmid for inducible expression of wild-type L27 | (47)          |
| IW312 pL27 -3                              | contains plasmid for inducible expression of L27 -3        | (47)          |
| IW312 pL27 -6                              | contains plasmid for inducible expression of L27 -6        | (47)          |
| IW312 $\Delta$ <i>toIC</i> pL27            | IW312 pL27 with <i>toIC</i> deleted                        | this work     |
| IW312 $\Delta$ <i>toIC</i> pL27 -3         | IW312 pL27 -3 with <i>toIC</i> deleted                     | this work     |
| IW312 $\Delta$ <i>toIC</i> pL27 -6         | IW312 pL27 -6 with <i>toIC</i> deleted                     | this work     |
| <i>N. gonorrhoeae</i> H041                 | Clinical multiple-antibiotic resistant isolate             | (10)          |
| <i>N. gonorrhoeae</i>                      | ATCC 49226                                                 | ATCC          |
| <i>N. gonorrhoeae</i>                      | ATCC 700719                                                | ATCC          |
| <i>N. gonorrhoeae</i>                      | ATCC 700825                                                | ATCC          |
| <i>N. gonorrhoeae</i>                      | BAA-1846                                                   | ATCC          |
| <i>N. gonorrhoeae</i>                      | CDC-0165                                                   | CDC-ARBank    |
| <i>N. gonorrhoeae</i>                      | CDC-0166                                                   | CDC-ARBank    |
| <i>N. gonorrhoeae</i>                      | CDC-0167                                                   | CDC-ARBank    |
| <i>N. gonorrhoeae</i>                      | CDC-0169                                                   | CDC-ARBank    |
| <i>N. gonorrhoeae</i>                      | CDC-0170                                                   | CDC-ARBank    |
| <i>N. gonorrhoeae</i>                      | CDC-0171                                                   | CDC-ARBank    |
| <i>N. gonorrhoeae</i>                      | CDC-0172                                                   | CDC-ARBank    |
| <i>N. gonorrhoeae</i>                      | CDC-0173                                                   | CDC-ARBank    |
| <i>N. gonorrhoeae</i>                      | CDC-0174                                                   | CDC-ARBank    |
| <i>N. gonorrhoeae</i>                      | CDC-0175                                                   | CDC-ARBank    |
| <i>N. gonorrhoeae</i>                      | CDC-0176                                                   | CDC-ARBank    |
| <i>N. gonorrhoeae</i>                      | CDC-0177                                                   | CDC-ARBank    |
| <i>N. gonorrhoeae</i>                      | CDC-0178                                                   | CDC-ARBank    |
| <i>N. gonorrhoeae</i>                      | CDC-0179                                                   | CDC-ARBank    |
| <i>N. gonorrhoeae</i>                      | CDC-0180                                                   | CDC-ARBank    |
| <i>N. gonorrhoeae</i>                      | CDC-0181                                                   | CDC-ARBank    |
| <i>N. gonorrhoeae</i>                      | CDC-0182                                                   | CDC-ARBank    |
| <i>N. gonorrhoeae</i>                      | CDC-0183                                                   | CDC-ARBank    |
| <i>N. gonorrhoeae</i>                      | CDC-0184                                                   | CDC-ARBank    |
| <i>N. gonorrhoeae</i>                      | CDC-0185                                                   | CDC-ARBank    |
| <i>N. gonorrhoeae</i>                      | CDC-0186                                                   | CDC-ARBank    |
| <i>N. gonorrhoeae</i>                      | CDC-0187                                                   | CDC-ARBank    |
| <i>N. gonorrhoeae</i>                      | CDC-0188                                                   | CDC-ARBank    |
| <i>N. gonorrhoeae</i>                      | CDC-0189                                                   | CDC-ARBank    |
| <i>N. gonorrhoeae</i>                      | CDC-0190                                                   | CDC-ARBank    |
| <i>N. gonorrhoeae</i>                      | WHO F                                                      | CDC-ARBank    |
| <i>N. gonorrhoeae</i>                      | WHO G                                                      | CDC-ARBank    |
| <i>N. gonorrhoeae</i>                      | WHO K                                                      | CDC-ARBank    |

|                                |                         |               |
|--------------------------------|-------------------------|---------------|
| <i>N. gonorrhoeae</i>          | WHO L                   | CDC-ARBank    |
| <i>N. gonorrhoeae</i>          | WHO M                   | CDC-ARBank    |
| <i>N. gonorrhoeae</i>          | WHO N                   | CDC-ARBank    |
| <i>N. gonorrhoeae</i>          | WHO O                   | CDC-ARBank    |
| <i>N. gonorrhoeae</i>          | WHO P                   | CDC-ARBank    |
| <i>N. gonorrhoeae</i>          | WHO U                   | CDC-ARBank    |
| <i>N. gonorrhoeae</i>          | WHO V                   | CDC-ARBank    |
| <i>N. gonorrhoeae</i>          | WHO W                   | CDC-ARBank    |
| <i>N. gonorrhoeae</i>          | WHO X                   | CDC-ARBank    |
| <i>N. gonorrhoeae</i>          | WHO Y                   | CDC-ARBank    |
| <i>N. gonorrhoeae</i>          | WHO Z                   | CDC-ARBank    |
| <i>N. gonorrhoeae</i>          | MMX 6744                | Micromyx, LLC |
| <i>N. gonorrhoeae</i>          | MMX 6746                | Micromyx, LLC |
| <i>N. gonorrhoeae</i>          | MMX 6752                | Micromyx, LLC |
| <i>N. gonorrhoeae</i>          | MMX 6753                | Micromyx, LLC |
| <i>N. gonorrhoeae</i>          | MMX 6757                | Micromyx, LLC |
| <i>N. gonorrhoeae</i>          | MMX 6758                | Micromyx, LLC |
| <i>N. gonorrhoeae</i>          | MMX 6762                | Micromyx, LLC |
| <i>N. gonorrhoeae</i>          | MMX 6767                | Micromyx, LLC |
| <i>N. gonorrhoeae</i>          | MMX 6771                | Micromyx, LLC |
| <i>N. gonorrhoeae</i>          | MMX 6793                | Micromyx, LLC |
| <i>N. gonorrhoeae</i>          | MMX 6797                | Micromyx, LLC |
| <i>N. gonorrhoeae</i>          | MMX 6803                | Micromyx, LLC |
| <i>N. gonorrhoeae</i>          | MMX 6812                | Micromyx, LLC |
| <i>N. gonorrhoeae</i>          | MMX 6818                | Micromyx, LLC |
| <i>N. gonorrhoeae</i>          | MMX 6819                | Micromyx, LLC |
| <i>N. gonorrhoeae</i>          | MMX 6879                | Micromyx, LLC |
| <i>N. gonorrhoeae</i>          | MMX 6921                | Micromyx, LLC |
| <i>N. gonorrhoeae</i>          | MMX 6922                | Micromyx, LLC |
| <i>N. gonorrhoeae</i>          | MMX 6983                | Micromyx, LLC |
| <i>N. gonorrhoeae</i>          | MMX 6989                | Micromyx, LLC |
| <i>N. gonorrhoeae</i>          | MMX 6990                | Micromyx, LLC |
| <i>N. gonorrhoeae</i>          | MMX 6992                | Micromyx, LLC |
| <i>N. gonorrhoeae</i>          | MMX 6996                | Micromyx, LLC |
| <i>N. gonorrhoeae</i>          | MMX 6998                | Micromyx, LLC |
| <i>N. gonorrhoeae</i>          | MMX 7002                | Micromyx, LLC |
| <i>N. gonorrhoeae</i>          | MMX 7005                | Micromyx, LLC |
| <i>Escherichia coli</i>        | KLE700                  | (48)          |
| <i>Escherichia coli</i>        | KLE701 <i>tolC::tet</i> | (48)          |
| <i>Klebsiella pneumoniae</i>   | ATCC 13883              | ATCC          |
| <i>Acinetobacter baumannii</i> | ATCC 19606              | ATCC          |
| <i>Pseudomonas aeruginosa</i>  | ATCC 27853              | ATCC          |
| <i>Moraxella catarrhalis</i>   | ATCC 8716               | ATCC          |
| <i>Legionella pneumophila</i>  | ATCC 33153              | ATCC          |
| <i>Haemophilus influenzae</i>  | ATCC 35056              | ATCC          |

|                                 |                 |               |
|---------------------------------|-----------------|---------------|
| <i>Staphylococcus aureus</i>    | BAA-1717        | ATCC          |
| <i>Staphylococcus aureus</i>    | MRSA-1234547263 | (49)          |
| <i>Staphylococcus aureus</i>    | MRSA-1094       | (50)          |
| <i>Staphylococcus aureus</i>    | ATCC 35556      | ATCC          |
| <i>Staphylococcus aureus</i>    | NRS-77          | BEI Resources |
| <i>Staphylococcus aureus</i>    | MSSA            | (50)          |
| <i>Staphylococcus aureus</i>    | N315, NRS-70    | BEI Resources |
| <i>Staphylococcus aureus</i>    | ATCC 25923      | ATCC          |
| <i>Staphylococcus aureus</i>    | THC1516         | (51)          |
| <i>Streptococcus pneumoniae</i> | ATCC 49619      | ATCC          |
| <i>Mycoplasma pneumoniae</i>    | ATCC 15531      | ATCC          |

| <u>plasmid name</u> | <u>description</u>                                                 | <u>source</u> |
|---------------------|--------------------------------------------------------------------|---------------|
| pET28-H10arfArnc    | plasmid to produce non-stop ribosomes <i>in vivo</i>               | this work     |
| pNL3.1              | nano-luciferase encoding plasmid                                   | Promega       |
| pMC1                | Nano-luciferase gene cloned into the NcoI and BamH1 sites of pET28 | this work     |

| <u>DNA name</u>   | <u>description</u>     | <u>sequence</u>                                                                                                                                                                                                                                                                                                                                                                                                                                           | <u>source</u> |
|-------------------|------------------------|-----------------------------------------------------------------------------------------------------------------------------------------------------------------------------------------------------------------------------------------------------------------------------------------------------------------------------------------------------------------------------------------------------------------------------------------------------------|---------------|
| T7 universal      | primer                 | TAATACGACTCACTATAGGG                                                                                                                                                                                                                                                                                                                                                                                                                                      | ThermoFisher  |
| nanoluc-ns        | primer                 | CCCCCGGTTACCCGGAAGA<br>GCAGGGAGCCGTC                                                                                                                                                                                                                                                                                                                                                                                                                      | this work     |
| nanoluc-stop      | primer                 | TTACAGAATCTCCTCGAACAG<br>CCG                                                                                                                                                                                                                                                                                                                                                                                                                              | this work     |
| tmRNA-nl template | synthetic DNA cassette | GGGGCTGATTCTGGATTCTGA<br>CGGGATTTGCGAAACCCAAG<br>GTGCATGCCGAGGGGCGGTT<br>GGCCTCGTAAAAAGCCGCAA<br>AAAATAGTCGCAGTCTCCGG<br>ATGGCGCCTTTTTAAAAAAT<br>TTCTTAATAACAATTTTTTTAG<br>CCCTCTCTCCCTAGCCTCCG<br>CTCTTAGGACGGGGATCAAG<br>AGAGGTCAAACCCAAAAGAG<br>ATCGCGTGGAAGCCCTGCCT<br>GGGGTTGAAGCGTTAAACTT<br>AATCAGGCTAGTTTGTAGTG<br>GCGTGTCCGTCCGCAGCTGG<br>CAAGCGAATGTAAAGACTGA<br>CTAAGCATGTAGTACCGAGG<br>ATGTAGGAATTTCCGGACGCG<br>GGTTCAACTCCCGCCAGCTC<br>CACCA | this work     |

858

859



860 **SUPPLEMENTAL FIGURES**

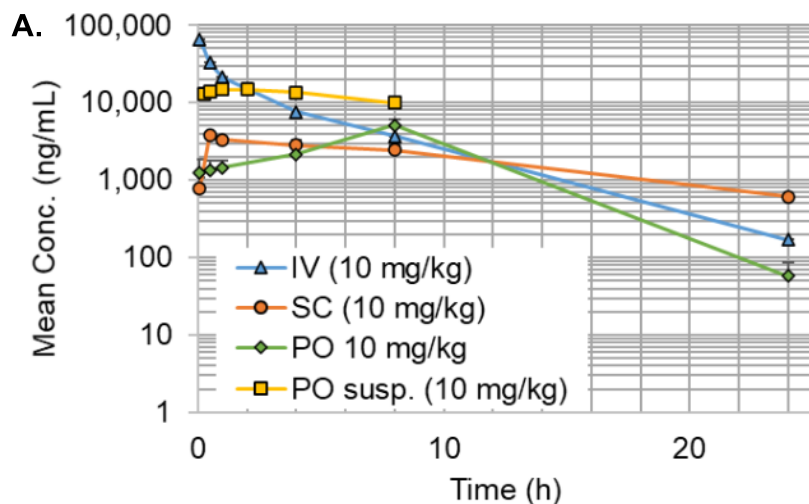

B.

|                   | $T_{1/2}$<br>(hr) | $C_{0/\max}$<br>(ng/mL) | $AUC_{\text{last}}$<br>(hr*ng/mL) | $V_{ss}$<br>(mL/kg) | CI<br>(mL/hr/kg) | %F<br>(Last) |
|-------------------|-------------------|-------------------------|-----------------------------------|---------------------|------------------|--------------|
| 10 mg/kg IV       | 3.55              | 76,507                  | 137,462                           | 266                 | 72.6             | -            |
| 10 mg/kg SC       | 8.76              | 3,793                   | 46,916                            | -                   | -                | 34           |
| 25 mg/kg SC       | -                 | 5,100                   | 76,085                            | -                   | -                | -            |
| 10 mg/kg PO       | -                 | 5,110                   | 62,617                            | -                   | -                | 46           |
| 10 mg/kg susp. PO | -                 | 14,812                  | 181,695                           | -                   | -                | >95*         |

861

862

863 **Supplemental Figure S1. Pharmacokinetic properties of MXB-4132** (A) Graphical  
 864 presentation of murine plasma concentration over time for MBX-4132. For clarity, error bars are  
 865 only shown in the positive direction. “susp.” Refers to the suspension formulation studies  
 866 performed at Neosome, all other data is from liquid formulation performed at Charles River Labs.  
 867 (B) Calculated parameters for each dosing regimen of MBX-4132. %F for the 10 mg/kg PO  
 868 suspension formulation is an estimate based on the IV data for different mouse species and  
 869 gender.

870

871

### dataset 1

no mask classification of 373,845 particles

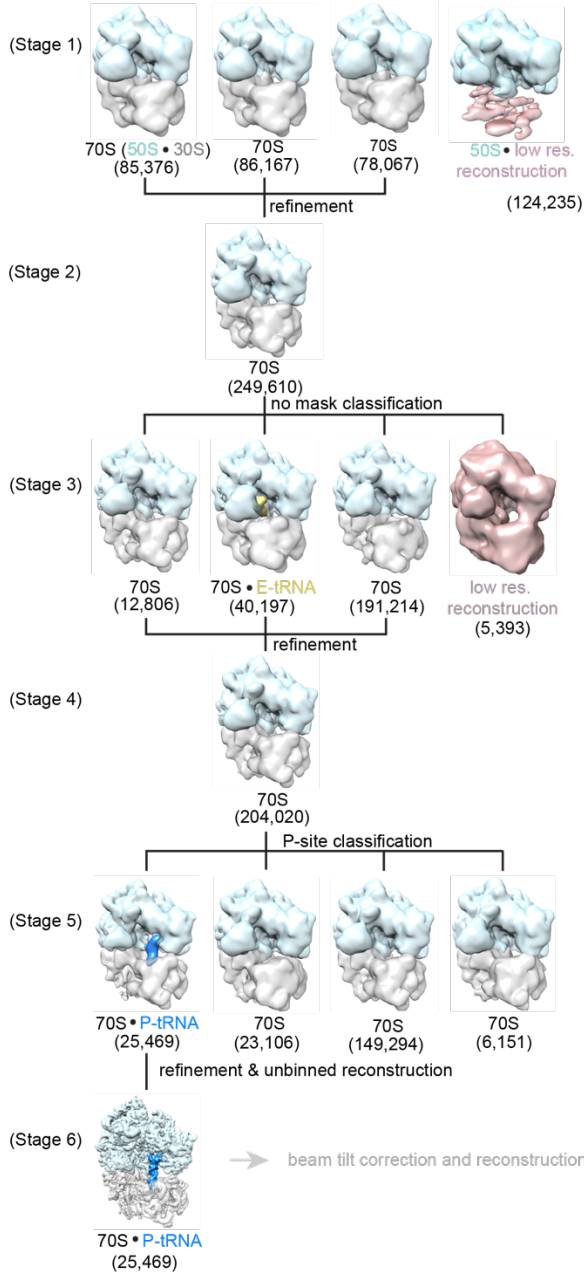

### combined with dataset 2

dataset 2: 100,537 particles classified and refined to pull out particles with P-tRNA

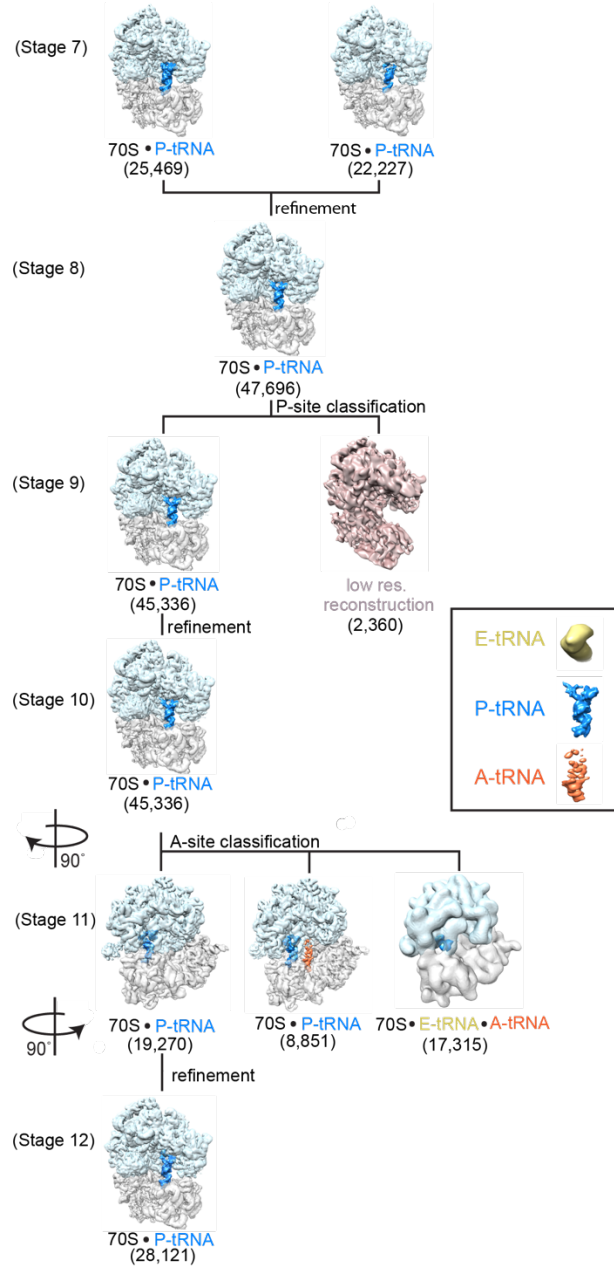

872

873

874

875

876

877

878

879

880

881

882

**Supplemental Figure S2. Classification of cryo-EM datasets of *E. coli* 70S complex containing P-site tRNA and KKL-2098.** To extract 70S particles with P-site tRNA and the KKL-2098 molecule several classification and refinement steps were performed. Stage 1) All particles were refined and reconstructed, then classification without alignment was performed to split the particles into 4 classes. Stage 2) 50S particles from stage 1 (shown in blue) were removed and the remaining particles refined. Stage 3) The aligned particles from stage 2 were classified into 4 classes. Stage 4) Particles contributing to the low-resolution reconstruction (pink) and 70S structures containing E-site tRNA (yellow) were removed and the remaining particles refined. Stage 5) Particles were classified without alignment into 4 classes using a P-site mask to identify particles with P-tRNA (blue). Stage 6) Particles containing P-tRNA were combined,

883 unbinned and refined. Stage 7) Particles were beam-tilt corrected. Stage 8) Particles from both  
884 datasets were combined and refined together. Stage 9) The combined particles were classified  
885 using a P-site mask. Stage 10) Particles contributing to the lower-resolution reconstruction were  
886 eliminated and 70S/P-tRNA particles were refined. Stage 11) The reconstruction from stage 10  
887 contained some A-site tRNA density, so a focused classification without alignment using an A-  
888 site mask was performed. Ribosomes are shown at 90° rotated view in respect to stage 10. Stage  
889 12) 70S particles containing A-site tRNA (orange) were eliminated and 70S/P-tRNA particles were  
890 refined to an overall resolution of 3.2 Å. The numbers of particles that make up each  
891 reconstruction are depicted for each complex.

892

893

894

895

896

897

898

899

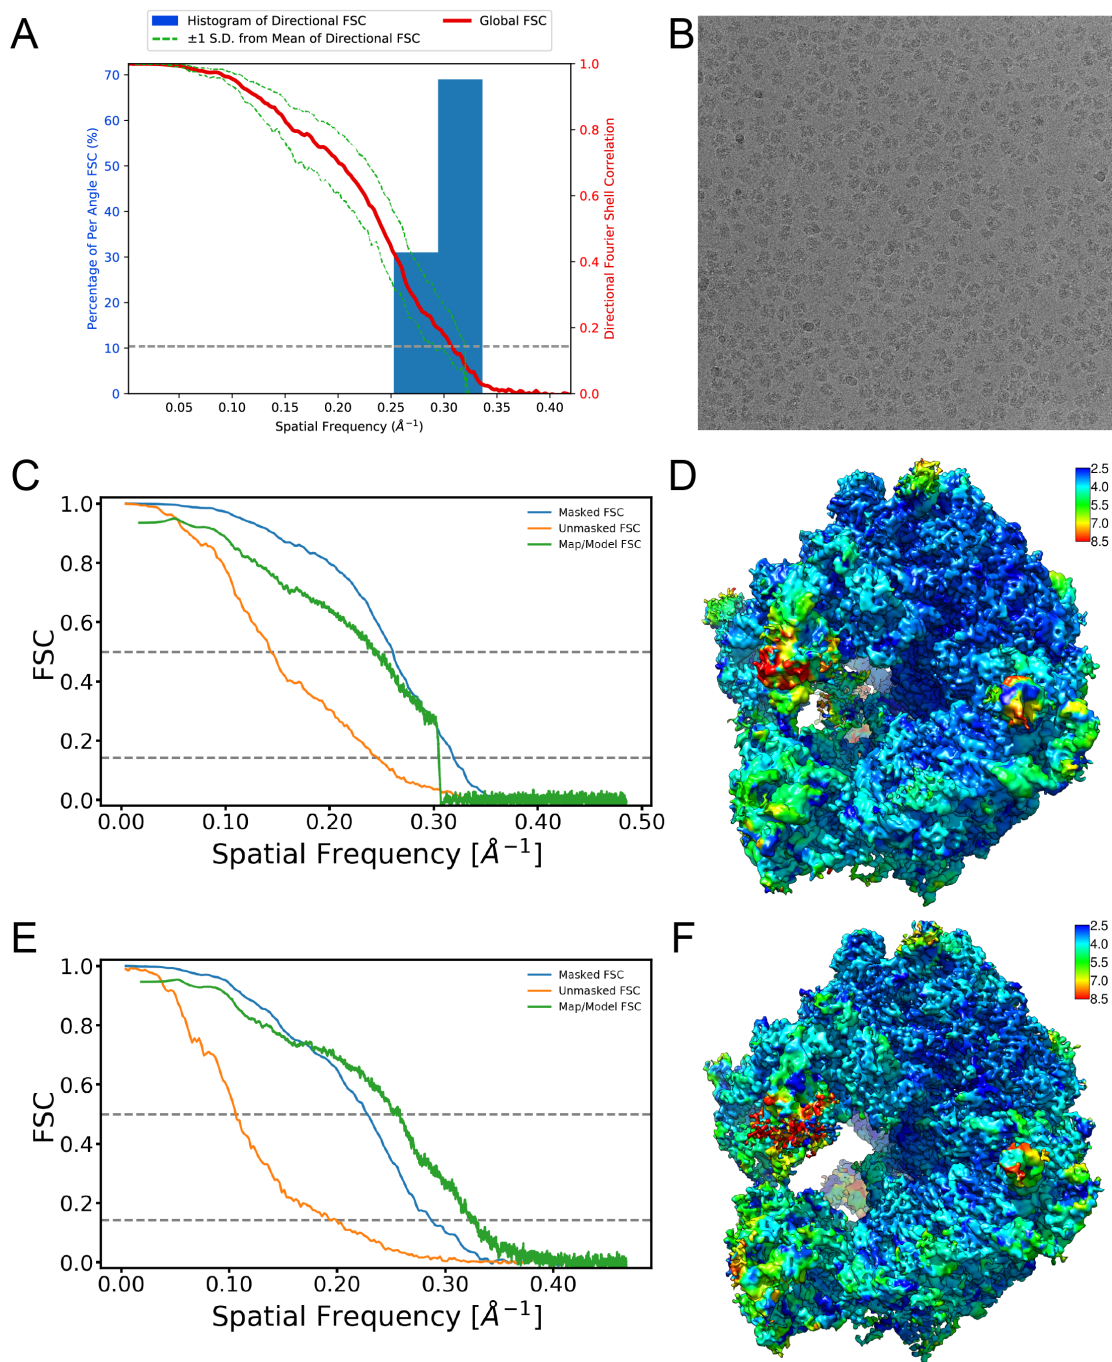

900  
 901  
 902 **Supplemental Figure S3. Resolution characterization and quality of cryo-EM maps.** (A) 3D  
 903 FSC plot (14) showing degree of directional anisotropy for the 70S•P-tRNA•KKL map. (B) A  
 904 representative micrograph from the cryo-EM dataset. (C) FSC plots for the 70S•P-tRNA•KKL map  
 905 for the independent half maps (orange) masked (cyan), and map/model FSC (green). Dotted lines  
 906 are shown at  $FSC_{0.5}$  and  $FSC_{0.143}$ . (D) Local resolution estimate for the 70S•P-tRNA•KKL-2098  
 907 map estimated from blocres (15). The map is colored from highest resolution (blue) to lowest  
 908 resolution (red). (E) FSC plots for the 70S•KKL-2098 map for the independent half maps (orange)  
 909 masked (cyan), and map/model FSC (green). (F) Local resolution estimate for the 70S•KKL map  
 910 colored as in D.

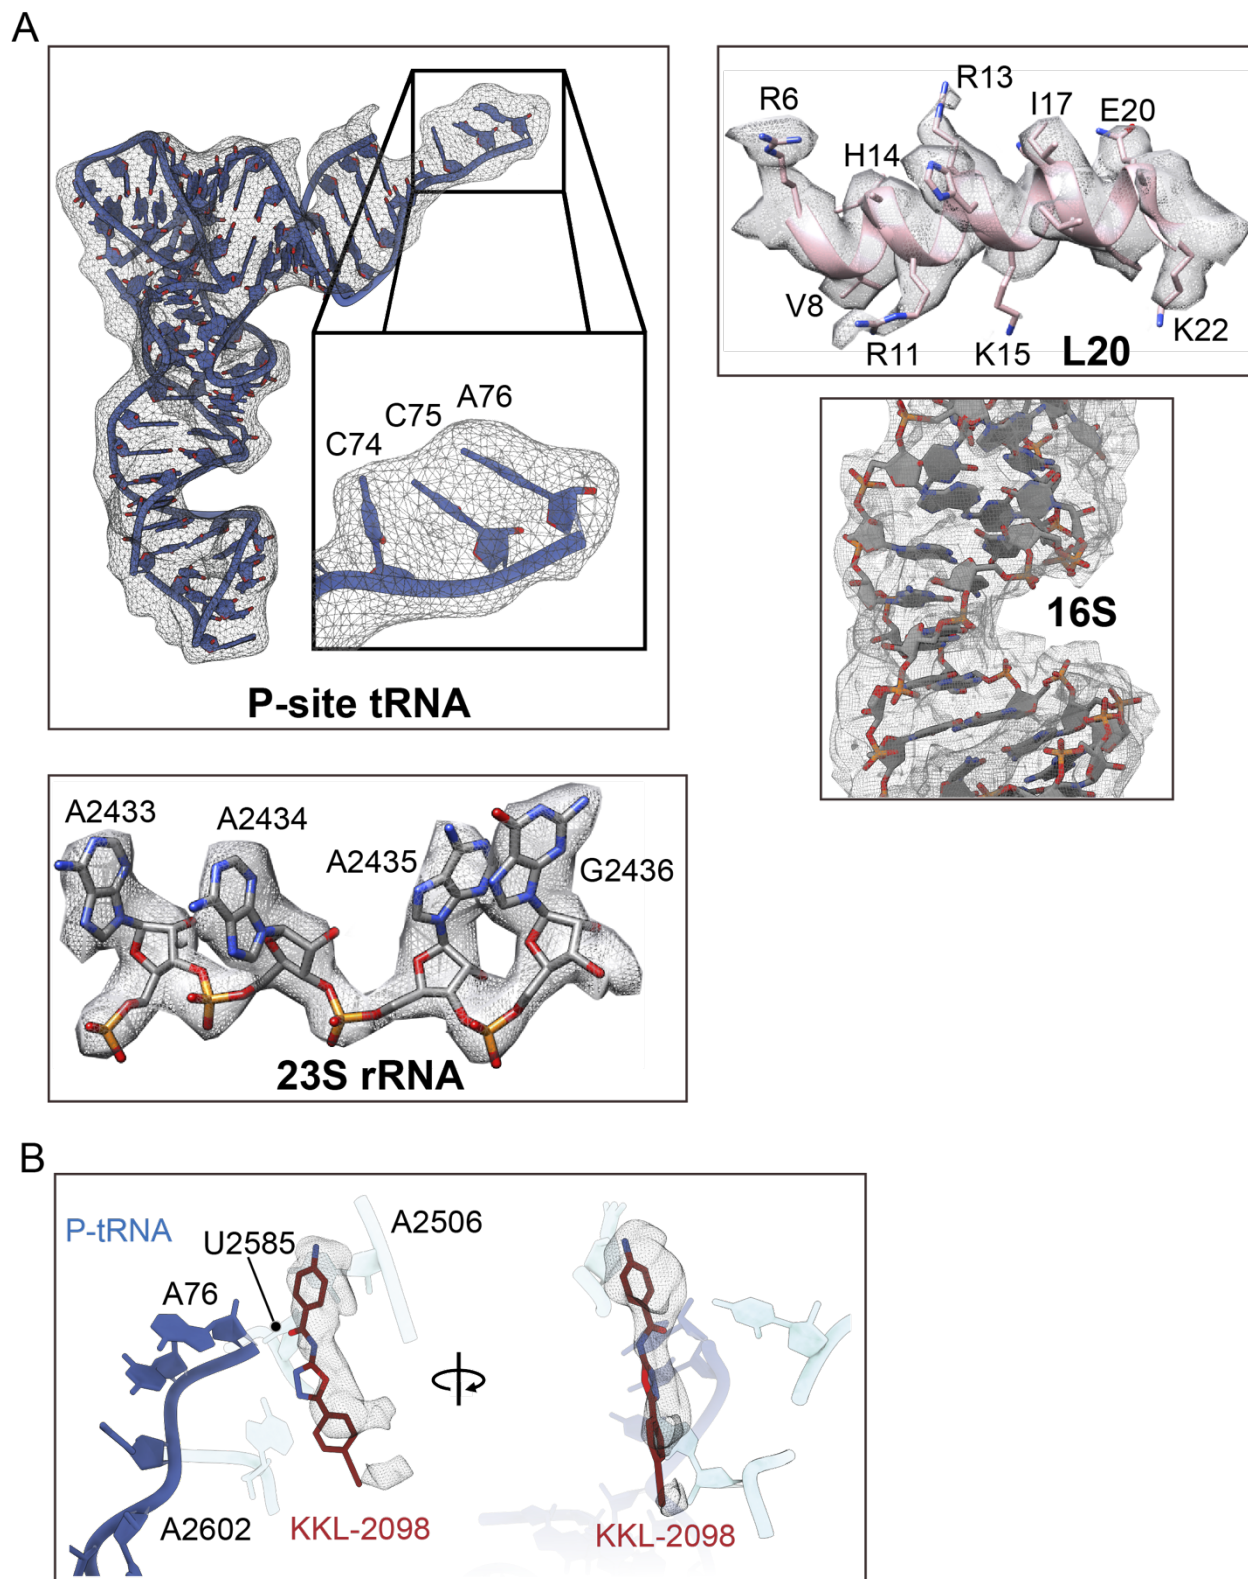

911  
912  
913  
914  
915

**Supplemental Figure S4. Data quality of representative areas of the 70S-P-tRNA-KKL-2098 map.** (A) Representative map quality of the P-site tRNA with the inset showing the CCA end. Map quality for ribosomal protein L20, 16S rRNA and 23S rRNA. (B) Map quality of KKL-2098.



916  
917  
918

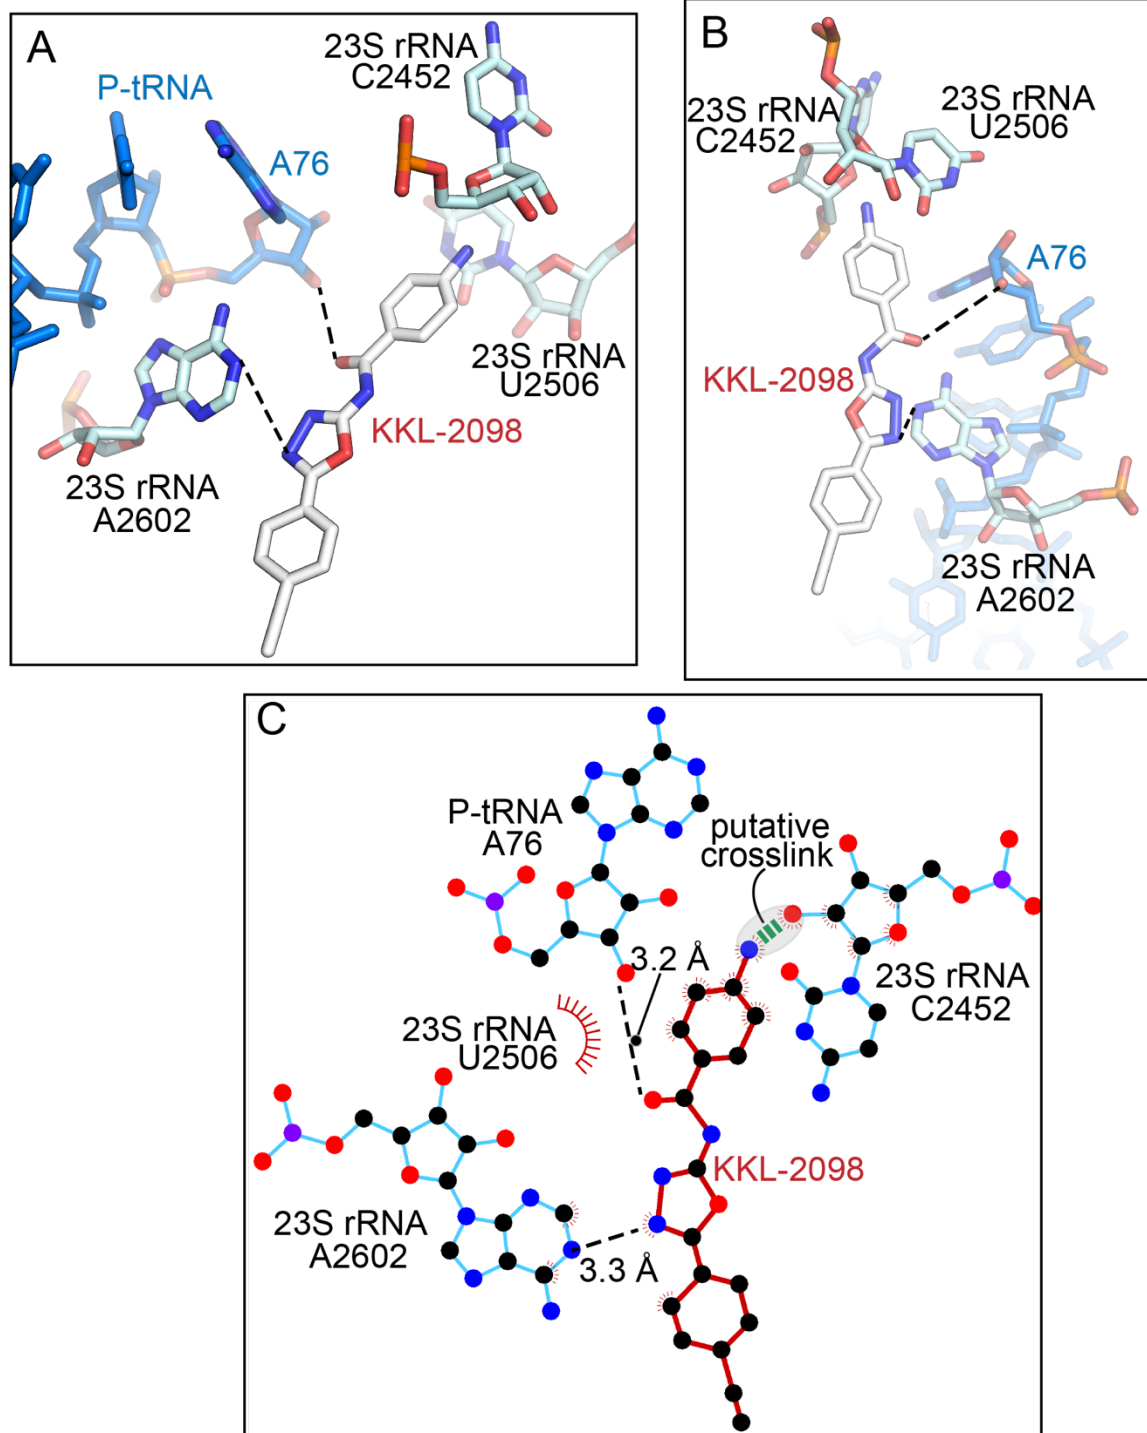

919  
920  
921  
922  
923  
924

**Supplemental Figure S5. Interaction network of KKL-2098 with the ribosome.** (A) Interactions with of KKL-2098 with P-site tRNA A76 and 23 rRNA nucleotides C2452, A2506, and A2602 with a  $\sim 90^\circ$  rotation in panel B. (C) A 2-dimensional representation of these interactions using LigPlot+ (52).

925  
926

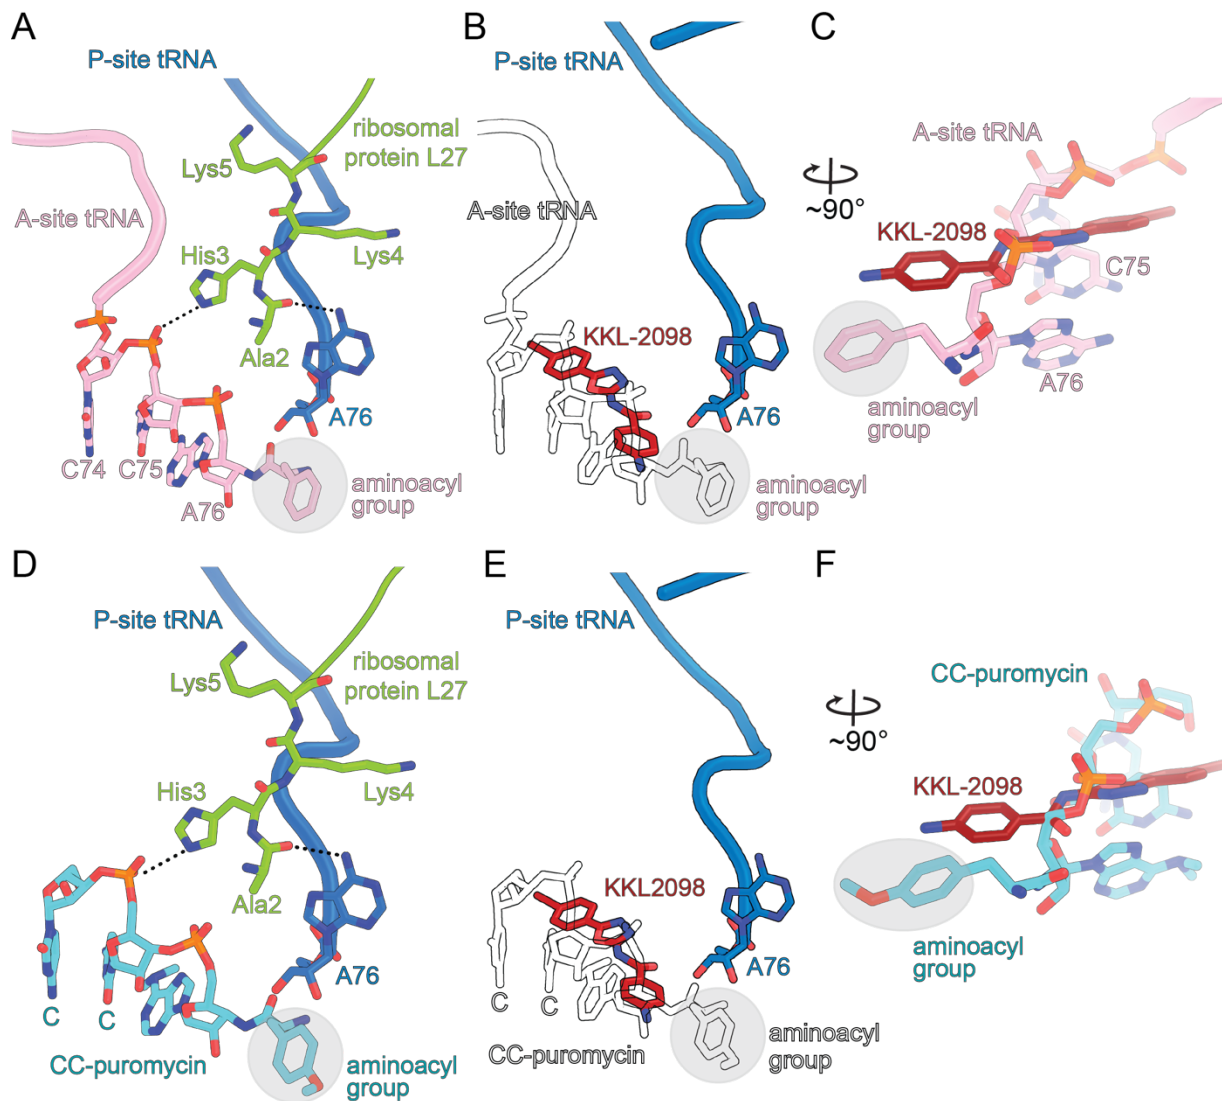

927  
928  
929  
930  
931  
932  
933  
934  
935

**Supplemental Figure S6. Comparison of KKL-2098 to A-site tRNA and CC-puromycin locations.** (A) The N terminus of L27 is stabilized when an aminoacylated (aa)-tRNA is bound at the A site (PDB ID 4V5C). (B) Overlay of aa-tRNA and KKL-2098. (C) A  $\sim 90^\circ$  rotation of panel B shows how KKL-2098 overlaps primarily with the phosphate of A76. (D) The stabilization of the N terminus of L27 also occurs when CC-puromycin is bound (PDB ID 6OTR). (E) Overlay of CC-puromycin and KKL-2098. (F) A  $\sim 90^\circ$  rotation of panel B shows how KKL-2098 overlaps primarily with the phosphate of CC-puromycin.

A 70S-P-tRNA-KKL-2098

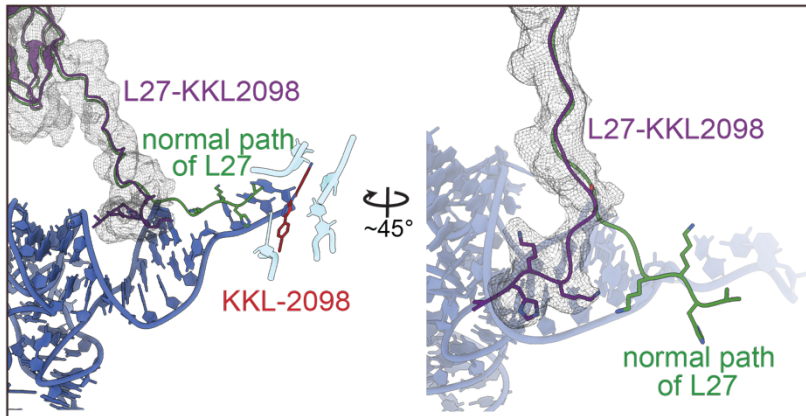

B 70S-KKL-2098

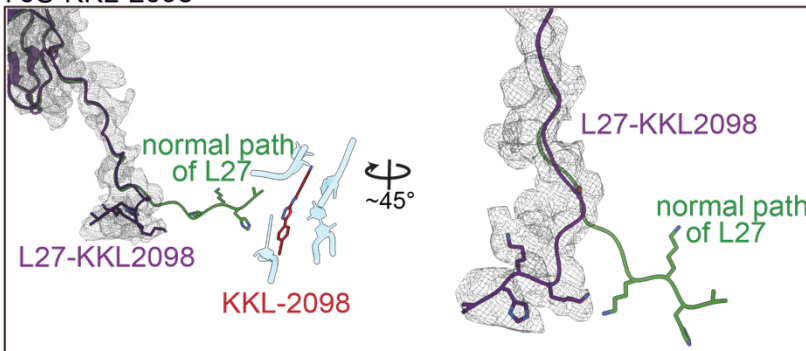

C

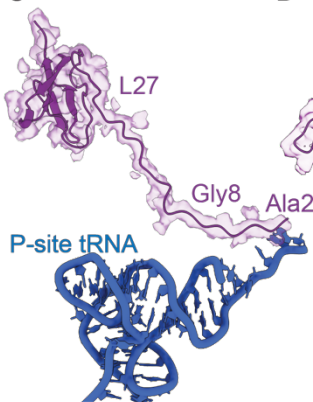

70S, P-site tRNA,  
aa-tRNA  
PDB code 4V5C

D

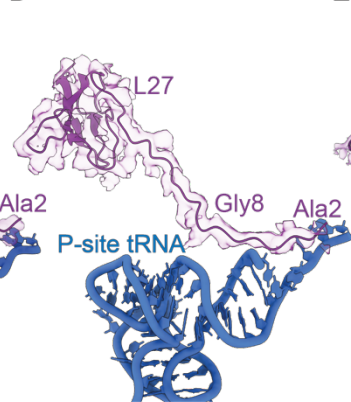

70S, P-site peptidyl-tRNA  
A-site tRNA, EF-P  
PDB code 6ENJ

E

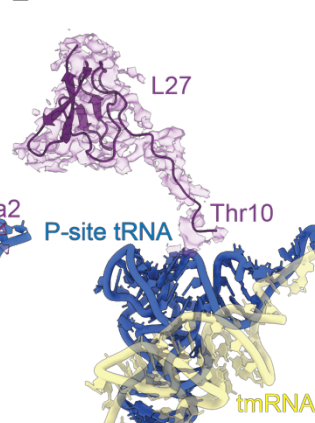

70S, P-site peptidyl-tRNA  
A-site tmRNA  
PDB code 6Q97

F

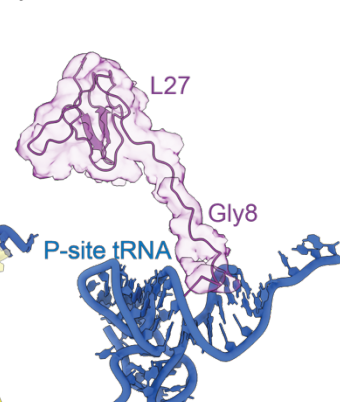

70S, P-site peptidyl-tRNA  
KKL-2098  
PDB code 6OM6

936

937

938

939

940

941

942

943

**Supplemental Figure S7. L27 map quality and its location in other structures.** (A) In the 70S-P-site tRNA-KKL-2098 structure, the N terminus of L27 (purple) moves  $\sim 180^\circ$  away from the PTC. The previously observed position of L27 is shown in green (PDB ID 6ENU). (B) In the 70S-KKL-2098 structure, L27 adopts a similar position as when P-site tRNA-KKL-2098 is bound as shown in panel A. It is proposed that these particles represent a complex where peptidyl-P-site tRNA has dropped off during preparation. Position and electron potential maps of L27 in PDB code 4V5C (C), 6ENJ (D), 6Q97 (E) and 6OM6 (F).



944 **Supplemental References**

945

946 1. J. Boström, A. Hogner, A. Llinàs, E. Wellner, A. T. Plowright, Oxadiazoles in Medicinal Chemistry. *J.*  
947 *Med. Chem.* **55**, 1817–1830 (2012).

948 2. S. T. Nguyen, S. M. Kwasny, X. Ding, S. C. Cardinale, C. T. McCarthy, H.-S. Kim, H. Nikaido, N. P.  
949 Peet, J. D. Williams, T. L. Bowlin, T. J. Opperman, Structure-activity relationships of a novel  
950 pyranopyridine series of Gram-negative bacterial efflux pump inhibitors. *Bioorg. Med. Chem.* **23**,  
951 2024–2034 (2015).

952 3. J. Kaur, M. Soto-Velasquez, Z. Ding, A. Ghanbarpour, M. A. Lill, R. M. van Rijn, V. J. Watts, D. P.  
953 Flaherty, Optimization of a 1,3,4-oxadiazole series for inhibition of Ca<sup>2+</sup>/calmodulin-stimulated  
954 activity of adenylyl cyclases 1 and 8 for the treatment of chronic pain. *Eur. J. Med. Chem.* **162**, 568–  
955 585 (2019).

956 4. S.-J. Yang, J.-H. Choe, A. Abdildinova, Y.-D. Gong, A Highly Efficient Diversification of 2-  
957 Amino/Amido-1,3,4-oxadiazole and 1,3,4-Thiadiazole Derivatives via Reagent-Based Cyclization of  
958 Thiosemicarbazide Intermediate on Solid-Phase. *ACS Comb. Sci.* **17**, 732–741 (2015).

959 5. M. Sakamoto, K. Miyazawa, Y. Tomimatsu, Addition Reactions of Heterocumulenes. II. 1, 4-  
960 Cycloaddition Reactions of Diphenylketene with Azadienes. *Chem. Pharm. Bull. (Tokyo)*. **24**, 2532–  
961 2540 (1976).

962 6. Clinical and Laboratory Standards Institute, Ed., *Methods for dilution antimicrobial susceptibility*  
963 *tests for bacteria that grow aerobically: M07-A10 ; approved standard* (Committee for Clinical  
964 Laboratory Standards, Wayne, PA, 10. ed., 2015), *Documents / Clinical and Laboratory Standards*  
965 *Institute*.

966 7. D. E. Macfarlane, T. F. Elias-Jones, Improved media for the culture of *Neisseria gonorrhoeae*. *J.*  
967 *Med. Microbiol.* **13**, 597–607 (1980).

968 8. M. M. Butler, S. L. Waidyarachchi, K. L. Connolly, A. E. Jerse, W. Chai, R. E. Lee, S. A. Kohlhoff, D. L.  
969 Shinabarger, T. L. Bowlin, Aminomethyl Spectinomycins as Therapeutics for Drug-Resistant  
970 Gonorrhea and Chlamydia Coinfections. *Antimicrob. Agents Chemother.* **62** (2018),  
971 doi:10.1128/AAC.00325-18.

972 9. M. Ohnishi, D. Golparian, K. Shimuta, T. Saika, S. Hoshina, K. Iwasaku, S. Nakayama, J. Kitawaki, M.  
973 Unemo, Is *Neisseria gonorrhoeae* Initiating a Future Era of Untreatable Gonorrhea?: Detailed  
974 Characterization of the First Strain with High-Level Resistance to Ceftriaxone. *Antimicrob. Agents*  
975 *Chemother.* **55**, 3538–3545 (2011).

976 10. M. Ohnishi, T. Saika, S. Hoshina, K. Iwasaku, S. Nakayama, H. Watanabe, J. Kitawaki, Ceftriaxone-  
977 Resistant *Neisseria gonorrhoeae*, Japan. *Emerg. Infect. Dis.* **17**, 148–149 (2011).

978 11. Pillai SK, Moellering RC, Eliopoulos GM, in *Antibiotics in Laboratory Medicine, 5th ed.* (Lippincott  
979 Williams & Wilkins, Philadelphia, PA., 2005), pp. 365–440.

980 12. A. S. Dixon, M. K. Schwinn, M. P. Hall, K. Zimmerman, P. Otto, T. H. Lubben, B. L. Butler, B. F.  
981 Binkowski, T. Machleidt, T. A. Kirkland, M. G. Wood, C. T. Eggers, L. P. Encell, K. V. Wood, NanoLuc

- 982 Complementation Reporter Optimized for Accurate Measurement of Protein Interactions in Cells.  
983 *ACS Chem. Biol.* **11**, 400–408 (2016).
- 984 13. T.-W. Kim, J.-W. Keum, I.-S. Oh, C.-Y. Choi, C.-G. Park, D.-M. Kim, Simple procedures for the  
985 construction of a robust and cost-effective cell-free protein synthesis system. *J. Biotechnol.* **126**,  
986 554–561 (2006).
- 987 14. N. S. Ramadoss, J. N. Alumasa, L. Cheng, Y. Wang, S. Li, B. S. Chambers, H. Chang, A. K. Chatterjee,  
988 A. Brinker, I. H. Engels, K. C. Keiler, Small molecule inhibitors of trans-translation have broad-  
989 spectrum antibiotic activity. *Proc. Natl. Acad. Sci. U. S. A.* **110**, 10282–10287 (2013).
- 990 15. C. J. Woolstenhulme, S. Parajuli, D. W. Healey, D. P. Valverde, E. N. Petersen, A. L. Starosta, N. R.  
991 Guydosh, W. E. Johnson, D. N. Wilson, A. R. Buskirk, Nascent peptides that block protein synthesis  
992 in bacteria. *Proc. Natl. Acad. Sci.* **110**, E878–E887 (2013).
- 993 16. Clinical and Laboratory Standards Institute, *Performance standards for antimicrobial susceptibility*  
994 *testing* (2017).
- 995 17. N. J. Marshall, C. J. Goodwin, S. J. Holt, A critical assessment of the use of microculture tetrazolium  
996 assays to measure cell growth and function. *Growth Regul.* **5**, 69–84 (1995).
- 997 18. W. Kuhnz, H. Gieschen, Predicting the oral bioavailability of 19-nortestosterone progestins in vivo  
998 from their metabolic stability in human liver microsomal preparations in vitro. *Drug Metab. Dispos.*  
999 *Biol. Fate Chem.* **26**, 1120–1127 (1998).
- 1000 19. R. S. Obach, J. G. Baxter, T. E. Liston, B. M. Silber, B. C. Jones, F. MacIntyre, D. J. Rance, P. Wastall,  
1001 The prediction of human pharmacokinetic parameters from preclinical and in vitro metabolism  
1002 data. *J. Pharmacol. Exp. Ther.* **283**, 46–58 (1997).
- 1003 20. I. J. Hidalgo, T. J. Raub, R. T. Borchardt, Characterization of the human colon carcinoma cell line  
1004 (Caco-2) as a model system for intestinal epithelial permeability. *Gastroenterology.* **96**, 736–749  
1005 (1989).
- 1006 21. M. J. Banker, T. H. Clark, J. A. Williams, Development and validation of a 96-well equilibrium  
1007 dialysis apparatus for measuring plasma protein binding. *J. Pharm. Sci.* **92**, 967–974 (2003).
- 1008 22. C. D. Bevan, R. S. Lloyd, A high-throughput screening method for the determination of aqueous  
1009 drug solubility using laser nephelometry in microtiter plates. *Anal. Chem.* **72**, 1781–1787 (2000).
- 1010 23. B. N. Ames, J. Mccann, E. Yamasaki, Methods for detecting carcinogens and mutagens with the  
1011 Salmonella/mammalian-microsome mutagenicity test. *Mutat. Res.* **31**, 347–364 (1975).
- 1012 24. D. M. Maron, B. N. Ames, Revised methods for the Salmonella mutagenicity test. *Mutat. Res.* **113**,  
1013 173–215 (1983).
- 1014 25. K. Mortelmans, E. Zeiger, The Ames Salmonella/microsome mutagenicity assay. *Mutat. Res.* **455**,  
1015 29–60 (2000).

- 1016 26. V. C. Abraham, D. L. Towne, J. F. Waring, U. Warrior, D. J. Burns, Application of a high-content  
1017 multiparameter cytotoxicity assay to prioritize compounds based on toxicity potential in humans.  
1018 *J. Biomol. Screen.* **13**, 527–537 (2008).
- 1019 27. L. D. Marroquin, J. Hynes, J. A. Dykens, J. D. Jamieson, Y. Will, Circumventing the Crabtree effect:  
1020 replacing media glucose with galactose increases susceptibility of HepG2 cells to mitochondrial  
1021 toxicants. *Toxicol. Sci. Off. J. Soc. Toxicol.* **97**, 539–547 (2007).
- 1022 28. D. G. Gibson, L. Young, R.-Y. Chuang, J. C. Venter, C. A. Hutchison, H. O. Smith, Enzymatic assembly  
1023 of DNA molecules up to several hundred kilobases. *Nat. Methods.* **6**, 343–345 (2009).
- 1024 29. Y. Chadani, E. Matsumoto, H. Aso, T. Wada, K. Kutsukake, S. Sutou, T. Abo, *trans*-translation-  
1025 mediated tight regulation of the expression of the alternative ribosome-rescue factor ArfA in  
1026 *Escherichia coli*. *Genes Genet. Syst.* **86**, 151–163 (2011).
- 1027 30. F. Garza-Sánchez, R. E. Schaub, B. D. Janssen, C. S. Hayes, tmRNA regulates synthesis of the ArfA  
1028 ribosome rescue factor. *Mol. Microbiol.* **80**, 1204–1219 (2011).
- 1029 31. Y. Zhang, S. Hong, A. Ruangprasert, G. Skiniotis, C. M. Dunham, Alternative mode of E-site tRNA  
1030 binding in the presence of a downstream mRNA stem-loop at the entrance channel. *Struct. Lond.*  
1031 *Engl.* **1993**, 26, 437-445.e3 (2018).
- 1032 32. J. N. Alumasa, P. S. Manzanillo, N. D. Peterson, T. Lundrigan, A. D. Baughn, J. S. Cox, K. C. Keiler,  
1033 Ribosome Rescue Inhibitors Kill Actively Growing and Nonreplicating Persister Mycobacterium  
1034 tuberculosis Cells. *ACS Infect. Dis.* **3**, 634–644 (2017).
- 1035 33. J. H. Mendez, A. Mehrani, P. Randolph, S. Stagg, Throughput and resolution with a next-generation  
1036 direct electron detector. *IUCrJ.* **6**, 1007–1013 (2019).
- 1037 34. C. Suloway, J. Pulokas, D. Fellmann, A. Cheng, F. Guerra, J. Quispe, S. Stagg, C. S. Potter, B.  
1038 Carragher, Automated molecular microscopy: the new Legion system. *J. Struct. Biol.* **151**, 41–60  
1039 (2005).
- 1040 35. G. C. Lander, S. M. Stagg, N. R. Voss, A. Cheng, D. Fellmann, J. Pulokas, C. Yoshioka, C. Irving, A.  
1041 Mulder, P.-W. Lau, D. Lyumkis, C. S. Potter, B. Carragher, Appion: an integrated, database-driven  
1042 pipeline to facilitate EM image processing. *J. Struct. Biol.* **166**, 95–102 (2009).
- 1043 36. K. Zhang, Gctf: Real-time CTF determination and correction. *J. Struct. Biol.* **193**, 1–12 (2016).
- 1044 37. A. Rohou, N. Grigorieff, CTFIND4: Fast and accurate defocus estimation from electron  
1045 micrographs. *J. Struct. Biol.* **192**, 216–221 (2015).
- 1046 38. L. K. Sheth, A. L. Piotrowski, N. R. Voss, Visualization and quality assessment of the contrast  
1047 transfer function estimation. *J. Struct. Biol.* **192**, 222–234 (2015).
- 1048 39. N. R. Voss, C. K. Yoshioka, M. Radermacher, C. S. Potter, B. Carragher, DoG Picker and TiltPicker:  
1049 software tools to facilitate particle selection in single particle electron microscopy. *J. Struct. Biol.*  
1050 **166**, 205–213 (2009).

- 1051 40. A. M. Roseman, FindEM--a fast, efficient program for automatic selection of particles from  
1052 electron micrographs. *J. Struct. Biol.* **145**, 91–99 (2004).
- 1053 41. S. H. W. Scheres, RELION: implementation of a Bayesian approach to cryo-EM structure  
1054 determination. *J. Struct. Biol.* **180**, 519–530 (2012).
- 1055 42. A. Korostelev, S. Trakhanov, M. Laurberg, H. F. Noller, Crystal structure of a 70S ribosome-tRNA  
1056 complex reveals functional interactions and rearrangements. *Cell.* **126**, 1065–1077 (2006).
- 1057 43. R. M. Voorhees, A. Weixlbaumer, D. Loakes, A. C. Kelley, V. Ramakrishnan, Insights into substrate  
1058 stabilization from snapshots of the peptidyl transferase center of the intact 70S ribosome. *Nat.*  
1059 *Struct. Mol. Biol.* **16**, 528–533 (2009).
- 1060 44. P. D. Adams, P. V. Afonine, G. Bunkóczy, V. B. Chen, I. W. Davis, N. Echols, J. J. Headd, L.-W. Hung,  
1061 G. J. Kapral, R. W. Grosse-Kunstleve, A. J. McCoy, N. W. Moriarty, R. Oeffner, R. J. Read, D. C.  
1062 Richardson, J. S. Richardson, T. C. Terwilliger, P. H. Zwart, PHENIX: a comprehensive Python-based  
1063 system for macromolecular structure solution. *Acta Crystallogr. D Biol. Crystallogr.* **66**, 213–221  
1064 (2010).
- 1065 45. Y. Z. Tan, P. R. Baldwin, J. H. Davis, J. R. Williamson, C. S. Potter, B. Carragher, D. Lyumkis,  
1066 Addressing preferred specimen orientation in single-particle cryo-EM through tilting. *Nat.*  
1067 *Methods.* **14**, 793–796 (2017).
- 1068 46. J. B. Heymann, Guidelines for using Bsoft for high resolution reconstruction and validation of  
1069 biomolecular structures from electron micrographs. *Protein Sci. Publ. Protein Soc.* **27**, 159–171  
1070 (2018).
- 1071 47. B. A. Maguire, A. D. Beniaminov, H. Ramu, A. S. Mankin, R. A. Zimmermann, A Protein Component  
1072 at the Heart of an RNA Machine: The Importance of Protein L27 for the Function of the Bacterial  
1073 Ribosome. *Mol. Cell.* **20**, 427–435 (2005).
- 1074 48. G. Tegos, F. R. Stermitz, O. Lomovskaya, K. Lewis, Multidrug pump inhibitors uncover remarkable  
1075 activity of plant antimicrobials. *Antimicrob. Agents Chemother.* **46**, 3133–3141 (2002).
- 1076 49. D. Aiello, M. H. Barnes, E. E. Biswas, S. B. Biswas, S. Gu, J. D. Williams, T. L. Bowlin, D. T. Moir,  
1077 Discovery, characterization and comparison of inhibitors of Bacillus anthracis and Staphylococcus  
1078 aureus replicative DNA helicases. *Bioorg. Med. Chem.* **17**, 4466–4476 (2009).
- 1079 50. T. J. Opperman, S. M. Kwasny, J. D. Williams, A. R. Khan, N. P. Peet, D. T. Moir, T. L. Bowlin, Aryl  
1080 rhodanines specifically inhibit staphylococcal and enterococcal biofilm formation. *Antimicrob.*  
1081 *Agents Chemother.* **53**, 4357–4367 (2009).
- 1082 51. B. E. Gonzalez, G. Martinez-Aguilar, K. G. Hulten, W. A. Hammerman, J. Coss-Bu, A. Avalos-  
1083 Mishaan, E. O. Mason, S. L. Kaplan, Severe Staphylococcal sepsis in adolescents in the era of  
1084 community-acquired methicillin-resistant Staphylococcus aureus. *Pediatrics.* **115**, 642–648 (2005).
- 1085 52. R. A. Laskowski, M. B. Swindells, LigPlot+: multiple ligand-protein interaction diagrams for drug  
1086 discovery. *J. Chem. Inf. Model.* **51**, 2778–2786 (2011).
